# Supplementary material
Source: publisher site journal article supplement (https://www.spandidos-publications.com/2182/downloadSupplementary)
Supplement: Supplementary file 1 [file downloadSupplementary]

## Sheet: PANC-1-Pink 298
Table SIII. DAVID GO and KEGG analysis of the different affected genes by statins in MiaPaCa2 and PANC1 cells, including pink, black modules in PANC1 cells and dark-grey, dark-turquoise, green-yellow modules in MiaPaCa2 cells.
Category	Term	Count	%	PValue	Genes	List Total	Pop Hits	Pop Total	Fold Enrichment	Bonferroni	Benjamini	FDR
KEGG_PATHWAY	hsa05016:Huntington's disease	24	8.16327	1.11262e-14	ATP5D, NDUFB3, ATP5E, NDUFB11, NDUFA2, CLTB, POLR2L, SLC25A4, NDUFB7, NDUFB8, POLR2J, NDUFB9, POLR2I, NDUFA13, COX5A, UQCRQ, NDUFA11, UQCRHL, NDUFS7, NDUFS5, UQCR10, UQCR11, NDUFS8, COX6A1	109	192	6879	7.88876	1.64313e-12	1.64313e-12	1.32228e-11
KEGG_PATHWAY	hsa05012:Parkinson's disease	21	7.14286	3.22913e-14	ATP5D, NDUFB3, ATP5E, NDUFB11, NDUFA2, SLC25A4, NDUFB7, NDUFB8, NDUFB9, NDUFA13, UBE2J2, COX5A, UQCRQ, UQCRHL, NDUFA11, NDUFS7, NDUFS5, UQCR10, UQCR11, NDUFS8, COX6A1	109	142	6879	9.33318	4.78151e-12	2.39075e-12	3.84914e-11
KEGG_PATHWAY	hsa05010:Alzheimer's disease	21	7.14286	8.45964e-13	ATP5D, NDUFB3, HSD17B10, ATP5E, NDUFB11, NDUFA2, NDUFB7, NDUFB8, NDUFB9, NDUFA13, BAD, COX5A, UQCRQ, UQCRHL, NDUFA11, NDUFS7, NDUFS5, UQCR10, UQCR11, NDUFS8, COX6A1	109	168	6879	7.88876	1.25207e-10	4.17355e-11	1.0079e-09
KEGG_PATHWAY	hsa00190:Oxidative phosphorylation	19	6.46259	1.43237e-12	ATP5D, NDUFB3, ATP5E, NDUFB11, NDUFA2, NDUFB7, NDUFB8, NDUFB9, NDUFA13, COX5A, UQCRQ, UQCRHL, NDUFA11, NDUFS7, NDUFS5, UQCR10, UQCR11, NDUFS8, COX6A1	109	133	6879	9.01573	2.11997e-10	5.29992e-11	1.70656e-09
KEGG_PATHWAY	hsa03010:Ribosome	17	5.78231	2.43534e-10	RPL19, RPLP2, RPS2, RPS5, MRPL20, MRPL24, RPS26, RPS19, RPS15, MRPL36, FAU, RPS20, MRPL32, RPS21, MRPL34, RPS27A, RPL36AL	109	136	6879	7.88876	3.6043e-08	7.2086e-09	2.90144e-07
KEGG_PATHWAY	hsa04932:Non-alcoholic fatty liver disease (NAFLD)	17	5.78231	1.17753e-09	NDUFB3, NDUFB11, NDUFA2, NDUFB7, NDUFB8, NDUFB9, NDUFA13, COX5A, UQCRQ, UQCRHL, NDUFA11, NDUFS7, UQCR10, NDUFS5, UQCR11, NDUFS8, COX6A1	109	151	6879	7.10511	1.74274e-07	2.90456e-08	1.4029e-06
KEGG_PATHWAY	hsa01100:Metabolic pathways	42	14.2857	4.19357e-07	NDUFB3, ATP5D, HSD17B10, ATP5E, POLR2L, NDUFB7, SRM, NDUFB8, NDUFB9, POLR2J, POLR2I, PMVK, COX5A, UQCRQ, NDUFS7, GSS, MTHFS, PGP, NDUFS5, POLE4, UQCR10, UQCR11, NDUFS8, INPP5E, NDUFB11, NDUFA2, C1GALT1C1, MOCS2, B4GAT1, EPHX2, NDUFA13, GRHPR, NDUFA11, DOLK, UQCRHL, ITPA, NME3, B3GAT3, PANK1, AKR1B1, COX6A1, NAT8L	109	1219	6879	2.17442	6.2063e-05	8.86638e-06	0.000499618
KEGG_PATHWAY	hsa04260:Cardiac muscle contraction	6	2.04082	0.00627866	UQCR10, UQCR11, COX6A1, COX5A, UQCRQ, UQCRHL	109	75	6879	5.04881	0.606302	0.109989	7.2293
KEGG_PATHWAY	hsa00240:Pyrimidine metabolism	6	2.04082	0.0209461	NUDT2, POLE4, NME3, POLR2L, POLR2J, POLR2I	109	101	6879	3.74911	0.956411	0.293976	22.2911
KEGG_PATHWAY	hsa03008:Ribosome biogenesis in eukaryotes	5	1.70068	0.0474325	RPP25, IMP3, MPHOSPH10, CSNK2B, POP7	109	87	6879	3.62702	0.999247	0.512856	43.9513
Category	Term	Count	%	PValue	Genes	List Total	Pop Hits	Pop Total	Fold Enrichment	Bonferroni	Benjamini	FDR
GOTERM_BP_DIRECT	GO:0006412~translation	23	7.82313	8.24516e-12	MRPS33, RPL19, COPS5, SLC25A4, MRPS24, RPLP2, RPS2, RPS5, MRPL20, MRPL24, RPS26, RPS19, RPS15, MRPL36, FAU, MRPL57, RPS20, SLC25A39, MRPL32, RPS21, MRPL34, RPS27A, RPL36AL	235	253	16792	6.49594	7.70925e-09	7.70925e-09	1.29155e-08
GOTERM_BP_DIRECT	GO:0032981~mitochondrial respiratory chain complex I assembly	12	4.08163	9.90646e-10	NDUFAF4, NDUFB3, NDUFS7, NDUFB11, NDUFA2, NDUFS5, NDUFB7, NDUFB8, NDUFB9, NDUFS8, NDUFA13, NDUFA11	235	63	16792	13.6105	9.26254e-07	4.63127e-07	1.55178e-06
GOTERM_BP_DIRECT	GO:0006120~mitochondrial electron transport, NADH to ubiquinone	11	3.7415	1.1636e-09	NDUFB3, NDUFS7, NDUFB11, NDUFA2, NDUFS5, NDUFB7, NDUFB8, NDUFB9, NDUFS8, NDUFA13, NDUFA11	235	49	16792	16.041	1.08796e-06	3.62654e-07	1.8227e-06
GOTERM_BP_DIRECT	GO:0070125~mitochondrial translational elongation	13	4.42177	2.16975e-09	MRPL53, MRPL40, MRPL24, MRPS26, GADD45GIP1, MRPS33, AURKAIP1, CHCHD1, MRPS24, MRPL36, MRPL32, MRPL34, MRPL20	235	85	16792	10.9285	2.02872e-06	5.0718e-07	3.39877e-06
GOTERM_BP_DIRECT	GO:0070126~mitochondrial translational termination	13	4.42177	2.49086e-09	MRPL53, MRPL40, MRPL24, MRPS26, GADD45GIP1, MRPS33, AURKAIP1, CHCHD1, MRPS24, MRPL36, MRPL32, MRPL34, MRPL20	235	86	16792	10.8014	2.32895e-06	4.65791e-07	3.90177e-06
GOTERM_BP_DIRECT	GO:0006364~rRNA processing	18	6.12245	8.38969e-09	UTP3, RPP25, RPL19, EXOSC4, MPHOSPH10, RPLP2, RPS2, RPS5, RPS26, IMP3, RPS19, WDR18, RPS15, FAU, RPS20, RPS21, RPS27A, DDX51	235	214	16792	6.01026	7.84433e-06	1.30739e-06	1.31419e-05
GOTERM_BP_DIRECT	GO:0006413~translational initiation	13	4.42177	4.84661e-07	RPL19, COPS5, RPLP2, RPS2, RPS5, RPS26, RPS19, EIF3G, RPS15, FAU, RPS20, RPS21, RPS27A	235	137	16792	6.78043	0.000453056	6.47348e-05	0.000759187
GOTERM_BP_DIRECT	GO:0006614~SRP-dependent cotranslational protein targeting to membrane	11	3.7415	7.40419e-07	RPS26, RPL19, RPS19, RPS15, FAU, RPLP2, RPS20, RPS2, RPS21, RPS5, RPS27A	235	94	16792	8.36179	0.000692053	8.65328e-05	0.00115981
GOTERM_BP_DIRECT	GO:0019083~viral transcription	11	3.7415	3.72472e-06	RPS26, RPL19, RPS19, RPS15, FAU, RPLP2, RPS20, RPS2, RPS21, RPS5, RPS27A	235	112	16792	7.01793	0.00347657	0.000386883	0.00583437
GOTERM_BP_DIRECT	GO:0000184~nuclear-transcribed mRNA catabolic process, nonsense-mediated decay	11	3.7415	6.43229e-06	RPS26, RPL19, RPS19, RPS15, FAU, RPLP2, RPS20, RPS2, RPS21, RPS5, RPS27A	235	119	16792	6.60511	0.00599616	0.00060124	0.0100753
GOTERM_BP_DIRECT	GO:1902600~hydrogen ion transmembrane transport	8	2.72109	2.14614e-05	UQCR10, UQCR11, COA6, COX6A1, CYB5A, COX5A, UQCRQ, UQCRHL	235	61	16792	9.37119	0.0198667	0.00182258	0.0336126
GOTERM_BP_DIRECT	GO:0000398~mRNA splicing, via spliceosome	12	4.08163	0.000291528	POLR2L, ZMAT5, GPKOW, CD2BP2, POLR2J, LSM7, POLR2I, CWC15, SNRPD2, SNRNP35, SF3B5, CTNNBL1	235	222	16792	3.86245	0.238616	0.022462	0.455684
GOTERM_BP_DIRECT	GO:0006122~mitochondrial electron transport, ubiquinol to cytochrome c	4	1.36054	0.00107394	UQCR10, UQCR11, UQCRQ, UQCRHL	235	15	16792	19.0548	0.633834	0.0743714	1.66907
GOTERM_BP_DIRECT	GO:0009060~aerobic respiration	5	1.70068	0.00109491	UQCR10, BLOC1S1, COX6A1, CHCHD5, UQCRHL	235	33	16792	10.8266	0.640953	0.0705521	1.70141
GOTERM_BP_DIRECT	GO:0016197~endosomal transport	6	2.04082	0.00225498	DPY30, CHMP4A, SNX17, SNF8, BLOC1S1, RPS27A	235	66	16792	6.49594	0.878857	0.131267	3.47447
GOTERM_BP_DIRECT	GO:0006283~transcription-coupled nucleotide-excision repair	6	2.04082	0.00371604	POLR2L, COPS5, POLR2J, POLR2I, RPS27A, RBX1	235	74	16792	5.79367	0.969223	0.195521	5.66499
GOTERM_BP_DIRECT	GO:0050434~positive regulation of viral transcription	4	1.36054	0.00747215	POLR2L, POLR2J, POLR2I, CTDP1	235	29	16792	9.85591	0.9991	0.338014	11.0847
GOTERM_BP_DIRECT	GO:0035269~protein O-linked mannosylation	3	1.02041	0.0204042	B4GAT1, SDF2L1, TMEM5	235	16	16792	13.3979	1	0.657282	27.5971
GOTERM_BP_DIRECT	GO:0000028~ribosomal small subunit assembly	3	1.02041	0.0282933	RPS19, RPS15, RPS5	235	19	16792	11.2824	1	0.756443	36.2108
GOTERM_BP_DIRECT	GO:0008380~RNA splicing	7	2.38095	0.0287509	ZMAT5, RBM4, MPHOSPH10, THOC6, SNRPD2, SNRNP35, ARL6IP4	235	166	16792	3.01318	1	0.744314	36.6797
GOTERM_BP_DIRECT	GO:0006368~transcription elongation from RNA polymerase II promoter	5	1.70068	0.032146	ADRM1, POLR2L, POLR2J, POLR2I, CTDP1	235	86	16792	4.15438	1	0.766547	40.0595
GOTERM_BP_DIRECT	GO:0010923~negative regulation of phosphatase activity	4	1.36054	0.03409	PCIF1, CD2BP2, PPP1R35, MPHOSPH10	235	51	16792	5.60434	1	0.771015	41.9179
GOTERM_BP_DIRECT	GO:0051403~stress-activated MAPK cascade	3	1.02041	0.0341215	CCM2, RBM4, RPS27A	235	21	16792	10.2079	1	0.756182	41.9475
GOTERM_BP_DIRECT	GO:0000027~ribosomal large subunit assembly	3	1.02041	0.0341215	RPF2, RPF1, MRPL20	235	21	16792	10.2079	1	0.756182	41.9475
GOTERM_BP_DIRECT	GO:0000715~nucleotide-excision repair, DNA damage recognition	3	1.02041	0.0403711	COPS5, RPS27A, RBX1	235	23	16792	9.32026	1	0.799195	47.5603
GOTERM_BP_DIRECT	GO:0090502~RNA phosphodiester bond hydrolysis, endonucleolytic	4	1.36054	0.0412594	RPP25, RNASEK, POP7, RNASEH2C	235	55	16792	5.19675	1	0.793166	48.3155

## Sheet: PANC-1-Black 378
Table SIII. DAVID GO and KEGG analysis of the different affected genes by statins in MiaPaCa2 and PANC1 cells, including pink, black modules in PANC1 cells and dark-grey, dark-turquoise, green-yellow modules in MiaPaCa2 cells.
Category	Term	Count	%	PValue	Genes	List Total	Pop Hits	Pop Total	Fold Enrichment	Bonferroni	Benjamini	FDR
KEGG_PATHWAY	hsa04141:Protein processing in endoplasmic reticulum	16	4.31267	2.71916e-06	SEC23A, SEC31A, SEC24A, DERL1, RRBP1, DNAJC10, EDEM3, LMAN1, PRKCSH, STT3A, RPN1, NFE2L2, SEC24C, TRAM1, SEC61A1, SEL1L	148	169	6879	4.40045	0.000527379	0.000527379	0.00339113
KEGG_PATHWAY	hsa04962:Vasopressin-regulated water reabsorption	7	1.88679	0.00031062	DYNC1LI2, ADCY9, RAB5A, CREB3L2, RAB11A, DCTN4, DCTN2	148	44	6879	7.3945	0.0584894	0.0296853	0.386699
KEGG_PATHWAY	hsa04144:Endocytosis	15	4.04313	0.000602109	EGFR, CHMP3, STAM2, SNX3, DAB2, GBF1, ARF1, ZFYVE9, RAB5A, RAB11A, WASL, TRAF6, VPS26B, RAB11FIP1, IQSEC1	148	241	6879	2.89293	0.110276	0.0381994	0.748328
KEGG_PATHWAY	hsa04320:Dorso-ventral axis formation	5	1.34771	0.0023959	EGFR, CPEB2, CPEB4, SOS2, SPIRE1	148	27	6879	8.60736	0.372093	0.109828	2.94731
KEGG_PATHWAY	hsa04540:Gap junction	7	1.88679	0.0110766	PRKCA, EGFR, PDGFB, ADCY9, GNAQ, MAP3K2, SOS2	148	88	6879	3.69725	0.884772	0.3509	12.9695
KEGG_PATHWAY	hsa05131:Shigellosis	6	1.61725	0.0115463	DOCK1, ROCK1, BTRC, WASL, FBXW11, ITGB1	148	64	6879	4.35747	0.894918	0.313056	13.4836
KEGG_PATHWAY	hsa04810:Regulation of actin cytoskeleton	11	2.96496	0.0142169	EGFR, DOCK1, ROCK1, PDGFB, PIKFYVE, SOS2, WASL, GNG12, ARHGEF12, ITGB1, PIP4K2C	148	210	6879	2.43465	0.937829	0.327558	16.3541
KEGG_PATHWAY	hsa04142:Lysosome	8	2.15633	0.0146894	GNS, AP1S3, LAMP2, TPP1, CTSA, CD164, GGA1, GLB1	148	121	6879	3.07304	0.943352	0.301529	16.8528
KEGG_PATHWAY	hsa00562:Inositol phosphate metabolism	6	1.61725	0.0175191	MTMR2, PIK3C2A, PIKFYVE, INPP4A, OCRL, PIP4K2C	148	71	6879	3.92786	0.967575	0.316809	19.7822
KEGG_PATHWAY	hsa04070:Phosphatidylinositol signaling system	7	1.88679	0.0181052	PRKCA, MTMR2, PIK3C2A, PIKFYVE, INPP4A, OCRL, PIP4K2C	148	98	6879	3.31998	0.97112	0.298447	20.377
KEGG_PATHWAY	hsa04915:Estrogen signaling pathway	7	1.88679	0.0189443	EGFR, SP1, ADCY9, GNAQ, SOS2, CREB3L2, SHC1	148	99	6879	3.28645	0.975534	0.286316	21.2215
KEGG_PATHWAY	hsa05110:Vibrio cholerae infection	5	1.34771	0.0245267	PRKCA, ADCY9, ARF1, KDELR1, SEC61A1	148	52	6879	4.4692	0.991913	0.330657	26.633
KEGG_PATHWAY	hsa04710:Circadian rhythm	4	1.07817	0.0277619	NPAS2, BTRC, PRKAA2, FBXW11	148	31	6879	5.99738	0.995755	0.343053	29.6106
KEGG_PATHWAY	hsa04114:Oocyte meiosis	7	1.88679	0.0311543	YWHAZ, YWHAG, CPEB2, ADCY9, BTRC, CPEB4, FBXW11	148	111	6879	2.93115	0.997845	0.355046	32.6131
KEGG_PATHWAY	hsa04510:Focal adhesion	10	2.69542	0.0319788	PRKCA, EGFR, DOCK1, ROCK1, PDGFB, ERBB2, SOS2, SHC1, LAMC1, ITGB1	148	206	6879	2.2563	0.998173	0.343183	33.3249
KEGG_PATHWAY	hsa04012:ErbB signaling pathway	6	1.61725	0.0380138	PRKCA, EGFR, ERBB2, GAB1, SOS2, SHC1	148	87	6879	3.2055	0.999457	0.374939	38.3275
KEGG_PATHWAY	hsa05200:Pathways in cancer	15	4.04313	0.0407704	PRKCA, EGFR, ROCK1, PDGFB, ERBB2, GNG12, APPL1, ARHGEF12, ITGB1, GNAQ, ADCY9, SOS2, SLC2A1, LAMC1, TRAF6	148	393	6879	1.77404	0.999689	0.378123	40.4957
KEGG_PATHWAY	hsa04921:Oxytocin signaling pathway	8	2.15633	0.041273	PRKCA, EGFR, ROCK1, ADCY9, GNAQ, EEF2K, RYR1, PRKAA2	148	150	6879	2.47892	0.999719	0.36509	40.8834
KEGG_PATHWAY	hsa04912:GnRH signaling pathway	6	1.61725	0.0447556	PRKCA, EGFR, ADCY9, GNAQ, MAP3K2, SOS2	148	91	6879	3.0646	0.999861	0.373446	43.5064
KEGG_PATHWAY	hsa05214:Glioma	5	1.34771	0.0497079	PRKCA, EGFR, PDGFB, SOS2, SHC1	148	65	6879	3.57536	0.999949	0.390163	47.0524
Category	Term	Count	%	PValue	Genes	List Total	Pop Hits	Pop Total	Fold Enrichment	Bonferroni	Benjamini	FDR
GOTERM_BP_DIRECT	GO:0006888~ER to Golgi vesicle-mediated transport	17	4.58221	1.13035e-07	SEC23A, COPA, DYNC1LI2, SEC31A, SEC24A, ATL3, LMAN1, DCTN4, ERGIC1, DCTN2, TMED7, GBF1, TMED2, ARCN1, CREB3L2, SEC24C, KDELR1	332	160	16792	5.37395	0.000182422	0.000182422	0.000189476
GOTERM_BP_DIRECT	GO:0019886~antigen processing and presentation of exogenous peptide antigen via MHC class II	11	2.96496	1.33273e-05	SEC23A, AP1S3, KIF3B, DYNC1LI2, SEC31A, SEC24A, ARF1, TRAF6, SEC24C, DCTN4, DCTN2	332	92	16792	6.04741	0.0212807	0.0106976	0.0223376
GOTERM_BP_DIRECT	GO:0006886~intracellular protein transport	17	4.58221	1.89789e-05	SEC23A, COPA, MYO6, SEC24A, STAM2, CTSA, AP1S3, TMED2, TOM1L2, TBC1D14, ARCN1, TBC1D5, TLK1, GGA1, VPS26B, SEC24C, KDELR1	332	236	16792	3.64335	0.0301678	0.0101588	0.0318087
GOTERM_BP_DIRECT	GO:0015031~protein transport	22	5.92992	3.99373e-05	SEC31A, CHMP3, RRBP1, PGAP1, C16ORF62, PTPN23, SPIRE1, SNX3, LMAN1, VPS8, TMED7, DAB2, GBF1, ARF1, ARCN1, RAB5A, RAB11A, TNKS, TRAM1, RAB11FIP1, SEC61A1, UBAP1	332	395	16792	2.81702	0.0624265	0.0159859	0.0669241
GOTERM_BP_DIRECT	GO:0048008~platelet-derived growth factor receptor signaling pathway	6	1.61725	0.000232354	PTPRJ, PDGFB, PIK3C2A, MYO1E, GAB1, PLEKHA1	332	29	16792	10.4645	0.312754	0.0722683	0.388773
GOTERM_BP_DIRECT	GO:0006897~endocytosis	11	2.96496	0.000436116	MIB1, SH3BP4, APP, MYO6, FNBP1L, PIK3C2A, ZFYVE9, MYO1E, RAB5A, ITSN2, ESYT2	332	139	16792	4.0026	0.50542	0.110718	0.728535
GOTERM_BP_DIRECT	GO:0006661~phosphatidylinositol biosynthetic process	7	1.88679	0.000957916	MTMR2, ARF1, PIK3C2A, PIKFYVE, INPP4A, OCRL, PIP4K2C	332	58	16792	6.10428	0.787075	0.198262	1.59365
GOTERM_BP_DIRECT	GO:2000370~positive regulation of clathrin-mediated endocytosis	3	0.808625	0.00114703	DAB2, SCYL2, WASL	332	3	16792	50.5783	0.843134	0.206693	1.90543
GOTERM_BP_DIRECT	GO:0043547~positive regulation of GTPase activity	23	6.19946	0.00195386	EGFR, F11R, PDGFB, ERBB2, RGP1, ITSN2, ARHGEF12, OCRL, ITGB1, MYO9A, NPRL3, FNIP1, ARHGAP32, DOCK1, NDEL1, GBF1, GNAQ, FNBP1L, SOS2, SHC1, RAPGEF2, SPATA13, IQSEC1	332	565	16792	2.05894	0.95743	0.295829	3.22521
GOTERM_BP_DIRECT	GO:0032007~negative regulation of TOR signaling	5	1.34771	0.0020887	SH3BP4, TMEM127, PRKAA2, NPRL3, FNIP1	332	28	16792	9.03184	0.965771	0.286425	3.44414
GOTERM_BP_DIRECT	GO:0007507~heart development	11	2.96496	0.0034699	PPARA, MEF2A, ECE1, PDGFB, GNAQ, ERBB2, GAB1, SOX4, HEG1, SHC1, TAB2	332	183	16792	3.04023	0.99634	0.399513	5.66006
GOTERM_BP_DIRECT	GO:2000785~regulation of autophagosome assembly	4	1.07817	0.0042037	TBC1D14, PIKFYVE, RAB5A, NPRL3	332	17	16792	11.9008	0.998885	0.432543	6.81779
GOTERM_BP_DIRECT	GO:0045807~positive regulation of endocytosis	4	1.07817	0.00497153	MIB1, DAB2, ARF1, EEF2K	332	18	16792	11.2396	0.999679	0.461396	8.01489
GOTERM_BP_DIRECT	GO:0006890~retrograde vesicle-mediated transport, Golgi to ER	7	1.88679	0.00559465	COPA, TMED7, KIF3B, GBF1, TMED2, ARCN1, KDELR1	332	82	16792	4.31766	0.999883	0.476278	8.97572
GOTERM_BP_DIRECT	GO:0048208~COPII vesicle coating	6	1.61725	0.00697125	SEC23A, SEC31A, SEC24A, TMED2, LMAN1, SEC24C	332	61	16792	4.97492	0.999988	0.528923	11.0651
GOTERM_BP_DIRECT	GO:0006605~protein targeting	5	1.34771	0.00708237	AP1S3, YWHAZ, YWHAG, PAN3, SORL1	332	39	16792	6.4844	0.99999	0.511773	11.2317
GOTERM_BP_DIRECT	GO:0098609~cell-cell adhesion	13	3.50404	0.00770876	RTN4, F11R, YWHAZ, HDLBP, MYO6, ZC3HAV1, STK24, TRIM25, ESYT2, FNBP1L, UBFD1, TMOD3, LRRFIP1	332	271	16792	2.42627	0.999996	0.520357	12.1658
GOTERM_BP_DIRECT	GO:0006468~protein phosphorylation	18	4.85175	0.00931738	PRKCA, CDK19, IRAK2, PAN3, ROCK1, PDGFB, STK24, ERBB2, APP, MAST2, MAP3K2, SCYL2, HIPK3, LMTK2, CDC42BPA, TLK1, PRKAA2, TAF1L	332	456	16792	1.99651	1	0.568019	14.5223
GOTERM_BP_DIRECT	GO:0034260~negative regulation of GTPase activity	5	1.34771	0.00999449	F11R, SH3BP4, CPEB2, TMED2, CDC42SE1	332	43	16792	5.8812	1	0.573983	15.4964
GOTERM_BP_DIRECT	GO:2000643~positive regulation of early endosome to late endosome transport	3	0.808625	0.0100276	MTMR2, DAB2, PTPN23	332	8	16792	18.9669	1	0.556612	15.5437
GOTERM_BP_DIRECT	GO:0046854~phosphatidylinositol phosphorylation	7	1.88679	0.0107041	EGFR, PDGFB, PIK3C2A, ERBB2, GAB1, PIKFYVE, PIP4K2C	332	94	16792	3.76647	1	0.562694	16.506
GOTERM_BP_DIRECT	GO:0042147~retrograde transport, endosome to Golgi	6	1.61725	0.0116005	SPAG9, GBF1, PIKFYVE, TBC1D5, RGP1, VPS26B	332	69	16792	4.39811	1	0.575156	17.7652
GOTERM_BP_DIRECT	GO:0035556~intracellular signal transduction	16	4.31267	0.0142511	PRKCA, ZBTB33, ARHGEF12, PRKCSH, MYO9A, PDZD8, MAST2, ADCY9, PIKFYVE, CDC42BPA, TLK1, SHC1, CAB39, PRKAA2, RAPGEF2, UNC13B	332	403	16792	2.00807	1	0.634778	21.3847
GOTERM_BP_DIRECT	GO:0042149~cellular response to glucose starvation	4	1.07817	0.0189864	CPEB4, SLC2A1, PRKAA2, NFE2L2	332	29	16792	6.97632	1	0.724484	27.4809
GOTERM_BP_DIRECT	GO:0043161~proteasome-mediated ubiquitin-dependent protein catabolic process	10	2.69542	0.019522	RNF44, C18ORF25, BTRC, ABTB2, RNF38, RNF216, RFFL, EDEM3, NFE2L2, FBXW11	332	203	16792	2.49154	1	0.719955	28.1417
GOTERM_BP_DIRECT	GO:0045892~negative regulation of transcription, DNA-templated	18	4.85175	0.0206761	ZNF281, BTAF1, COPS2, ZBTB33, ZBTB21, PDGFB, BTRC, HR, ZNF12, CBFA2T2, AHR, PURA, DAB2, RBAK, LRRFIP1, TRAF6, FBXW11, KDM5C	332	499	16792	1.82447	1	0.726639	29.5465
GOTERM_BP_DIRECT	GO:0002474~antigen processing and presentation of peptide antigen via MHC class I	4	1.07817	0.0207948	SEC23A, SEC31A, SEC24A, SEC24C	332	30	16792	6.74378	1	0.715258	29.6895
GOTERM_BP_DIRECT	GO:0007052~mitotic spindle organization	4	1.07817	0.0207948	KIF3B, MAP4, TNKS, DCTN2	332	30	16792	6.74378	1	0.715258	29.6895
GOTERM_BP_DIRECT	GO:0048511~rhythmic process	5	1.34771	0.0216581	SP1, BTRC, PRKAA2, FBXW11, KDM5C	332	54	16792	4.68318	1	0.716956	30.7214
GOTERM_BP_DIRECT	GO:0032091~negative regulation of protein binding	5	1.34771	0.0258489	PPARA, DAB2, ROCK1, PDGFB, SORL1	332	57	16792	4.43669	1	0.767193	35.5314
GOTERM_BP_DIRECT	GO:0015693~magnesium ion transport	3	0.808625	0.026179	MAGT1, NIPAL3, NIPA1	332	13	16792	11.6719	1	0.760019	35.8966
GOTERM_BP_DIRECT	GO:0036498~IRE1-mediated unfolded protein response	5	1.34771	0.0288948	SEC31A, TPP1, SHC1, CTDSP2, SEC61A1	332	59	16792	4.2863	1	0.782718	38.8284
GOTERM_BP_DIRECT	GO:0007249~I-kappaB kinase/NF-kappaB signaling	5	1.34771	0.0304943	IRAK2, TNFRSF1A, ROCK1, TRAF6, TAB2	332	60	16792	4.21486	1	0.790283	40.4955
GOTERM_BP_DIRECT	GO:0030433~ER-associated ubiquitin-dependent protein catabolic process	5	1.34771	0.0304943	DERL1, UBE4A, DNAJC10, EDEM3, SEL1L	332	60	16792	4.21486	1	0.790283	40.4955
GOTERM_BP_DIRECT	GO:0006865~amino acid transport	4	1.07817	0.0312043	SLC38A2, SLC7A1, SLC38A1, SLC7A5	332	35	16792	5.78038	1	0.787857	41.2218
GOTERM_BP_DIRECT	GO:0016055~Wnt signaling pathway	9	2.42588	0.0322461	DIXDC1, DAB2, ZBTB33, BTRC, CTNND1, TNKS, PRKAA2, SNX3, FBXW11	332	187	16792	2.43425	1	0.789014	42.2723
GOTERM_BP_DIRECT	GO:0050714~positive regulation of protein secretion	4	1.07817	0.0335582	SEC24A, ARF1, UNC13B, ADAM9	332	36	16792	5.61981	1	0.792801	43.5704
GOTERM_BP_DIRECT	GO:0036503~ERAD pathway	3	0.808625	0.0343433	DERL1, TRIM25, SEL1L	332	15	16792	10.1157	1	0.791285	44.334
GOTERM_BP_DIRECT	GO:0018105~peptidyl-serine phosphorylation	7	1.88679	0.0374402	PRKCA, MAST2, PDGFB, HIPK3, LMTK2, TNKS, CAB39	332	125	16792	2.83239	1	0.810727	47.252
GOTERM_BP_DIRECT	GO:0038128~ERBB2 signaling pathway	4	1.07817	0.0385345	EGFR, ERBB2, GAB1, SHC1	332	38	16792	5.32403	1	0.811578	48.2482
GOTERM_BP_DIRECT	GO:1903830~magnesium ion transmembrane transport	3	0.808625	0.0387477	MAGT1, NIPAL3, NIPA1	332	16	16792	9.48343	1	0.805136	48.4403
GOTERM_BP_DIRECT	GO:0051046~regulation of secretion	2	0.539084	0.0390361	MYO6, POFUT2	332	2	16792	50.5783	1	0.799447	48.699
GOTERM_BP_DIRECT	GO:0030198~extracellular matrix organization	9	2.42588	0.0407657	F11R, APP, PDGFB, DAG1, OLFML2A, NID1, ATXN1L, LAMC1, ITGB1	332	196	16792	2.32247	1	0.80571	50.225
GOTERM_BP_DIRECT	GO:0048738~cardiac muscle tissue development	3	0.808625	0.0433536	SIN3B, BMPR2, NPRL3	332	17	16792	8.92558	1	0.817902	52.4287
GOTERM_BP_DIRECT	GO:0018279~protein N-linked glycosylation via asparagine	4	1.07817	0.0438641	MAGT1, STT3A, RPN1, LMAN1	332	40	16792	5.05783	1	0.814302	52.8524
GOTERM_BP_DIRECT	GO:0010971~positive regulation of G2/M transition of mitotic cell cycle	3	0.808625	0.0481513	APP, RAB11A, BRD4	332	18	16792	8.42972	1	0.836382	56.2736
GOTERM_BP_DIRECT	GO:0090002~establishment of protein localization to plasma membrane	4	1.07817	0.0495405	F11R, TNFRSF1A, ROCK1, TSPAN14	332	42	16792	4.81698	1	0.838359	57.3312
GOTERM_BP_DIRECT	GO:0045893~positive regulation of transcription, DNA-templated	17	4.58221	0.0496297	ZNF281, PPARA, PDGFB, ELF4, BTRC, SOX4, AHR, NCOA1, DAB2, NPAS2, SP1, MAP3K2, CREB3L2, SETD7, NFE2L1, FBXW11, TAF1L	332	515	16792	1.66958	1	0.832379	57.3982
GOTERM_BP_DIRECT	GO:0051056~regulation of small GTPase mediated signal transduction	7	1.88679	0.0496359	RALGAPA2, ARHGAP32, RALGAPB, SOS2, OCRL, ARHGEF12, MYO9A	332	134	16792	2.64215	1	0.825926	57.4029

## Sheet: MIA2-Darkgrey 359
Table SIII. DAVID GO and KEGG analysis of the different affected genes by statins in MiaPaCa2 and PANC1 cells, including pink, black modules in PANC1 cells and dark-grey, dark-turquoise, green-yellow modules in MiaPaCa2 cells.
Category	Term	Count	%	PValue	Genes	List Total	Pop Hits	Pop Total	Fold Enrichment	Bonferroni	Benjamini	FDR
KEGG_PATHWAY	hsa05012:Parkinson's disease	13	3.66197	1.57359e-05	ATP5D, NDUFS7, ATP5E, NDUFB11, NDUFS4, UQCR11, NDUFB7, COX7C, UBA7, NDUFA13, NDUFA1, NDUFB2, UQCRB	133	142	6879	4.73509	0.00292262	0.00292262	0.019487
KEGG_PATHWAY	hsa00190:Oxidative phosphorylation	12	3.38028	4.41322e-05	ATP5D, NDUFS7, ATP5E, NDUFB11, NDUFS4, UQCR11, NDUFB7, COX7C, NDUFA13, NDUFA1, NDUFB2, UQCRB	133	133	6879	4.66663	0.00817516	0.00409597	0.0546435
KEGG_PATHWAY	hsa05010:Alzheimer's disease	13	3.66197	8.35475e-05	ATP5D, NDUFS7, ATP5E, NDUFB11, APP, NDUFS4, UQCR11, NDUFB7, COX7C, NDUFA13, NDUFA1, NDUFB2, UQCRB	133	168	6879	4.00228	0.0154204	0.00516677	0.103424
KEGG_PATHWAY	hsa05016:Huntington's disease	13	3.66197	0.000295276	ATP5D, ATP5E, NDUFB11, NDUFB7, COX7C, NDUFA13, NDUFA1, NDUFB2, NDUFS7, UQCR11, NDUFS4, CREB3L1, UQCRB	133	192	6879	3.502	0.0534481	0.0136385	0.365083
KEGG_PATHWAY	hsa04932:Non-alcoholic fatty liver disease (NAFLD)	10	2.8169	0.00237974	NDUFS7, NDUFB11, NDUFS4, UQCR11, NDUFB7, COX7C, NDUFA13, NDUFA1, NDUFB2, UQCRB	133	151	6879	3.42529	0.357995	0.0848174	2.90768
KEGG_PATHWAY	hsa03010:Ribosome	9	2.53521	0.00447592	RPSA, RPL23, RPL34, RPL15, RPS10, RPL24, RPL23A, RPL39, MRPL33	133	136	6879	3.42277	0.565861	0.129829	5.40431
KEGG_PATHWAY	hsa00280:Valine, leucine and isoleucine degradation	5	1.40845	0.0122163	ALDH6A1, MUT, IVD, ACADS, HADHA	133	47	6879	5.50232	0.898351	0.278631	14.1209
KEGG_PATHWAY	hsa00640:Propanoate metabolism	4	1.12676	0.0159402	ALDH6A1, MUT, ACSS1, HADHA	133	28	6879	7.38883	0.949651	0.311745	18.0457
KEGG_PATHWAY	hsa04512:ECM-receptor interaction	6	1.69014	0.0254671	LAMB2, DAG1, HSPG2, COL6A1, COL5A2, THBS3	133	87	6879	3.56702	0.991756	0.41324	27.3483
KEGG_PATHWAY	hsa01100:Metabolic pathways	33	9.29577	0.0346387	SGSH, ATP5D, ATP5E, IMPA2, NDUFB7, NDST2, COX7C, PMVK, UXS1, HADHA, NDUFB2, NDUFS7, ACSS1, MUT, NDUFS4, UQCR11, IVD, IMPDH2, ALDH6A1, NDUFB11, ACADS, PGAP1, GALT, NDUFA13, NDUFA1, ADI1, NME3, HYKK, PTGDS, MBOAT2, GAMT, OAT, UQCRB	133	1219	6879	1.40018	0.99858	0.480923	35.3772
Category	Term	Count	%	PValue	Genes	List Total	Pop Hits	Pop Total	Fold Enrichment	Bonferroni	Benjamini	FDR
GOTERM_BP_DIRECT	GO:0006120~mitochondrial electron transport, NADH to ubiquinone	7	1.97183	0.000230811	NDUFS7, NDUFB11, NDUFS4, NDUFB7, NDUFA13, NDUFA1, NDUFB2	302	49	16792	7.94324	0.297389	0.297389	0.383696
GOTERM_BP_DIRECT	GO:0032981~mitochondrial respiratory chain complex I assembly	7	1.97183	0.000909599	NDUFS7, NDUFB11, NDUFS4, NDUFB7, NDUFA13, NDUFA1, NDUFB2	302	63	16792	6.17807	0.751276	0.501277	1.5041
GOTERM_BP_DIRECT	GO:0030574~collagen catabolic process	7	1.97183	0.000988831	COL18A1, CTSK, COL26A1, COL7A1, COL6A1, CTSB, COL5A2	302	64	16792	6.08154	0.779679	0.396026	1.6341
GOTERM_BP_DIRECT	GO:0006614~SRP-dependent cotranslational protein targeting to membrane	8	2.25352	0.00150071	RPSA, RPL23, RPL34, RPL15, RPS10, RPL24, RPL23A, RPL39	302	94	16792	4.73214	0.899371	0.436776	2.47012
GOTERM_BP_DIRECT	GO:0046533~negative regulation of photoreceptor cell differentiation	3	0.84507	0.00187626	NOTCH1, SOX9, SOX8	302	4	16792	41.702	0.943386	0.436901	3.07923
GOTERM_BP_DIRECT	GO:0060041~retina development in camera-type eye	6	1.69014	0.00377555	LAMB2, PFDN5, RPL24, SOX9, SOX8, IMPDH2	302	58	16792	5.752	0.996923	0.618619	6.10531
GOTERM_BP_DIRECT	GO:0019083~viral transcription	8	2.25352	0.00404737	RPSA, RPL23, RPL34, RPL15, RPS10, RPL24, RPL23A, RPL39	302	112	16792	3.97162	0.997973	0.587639	6.53107
GOTERM_BP_DIRECT	GO:0048208~COPII vesicle coating	6	1.69014	0.0046937	TRAPPC6A, COL7A1, USO1, TRAPPC5, TRAPPC1, SEC24C	302	61	16792	5.46911	0.999249	0.593103	7.53613
GOTERM_BP_DIRECT	GO:0000184~nuclear-transcribed mRNA catabolic process, nonsense-mediated decay	8	2.25352	0.00563265	RPSA, RPL23, RPL34, RPL15, RPS10, RPL24, RPL23A, RPL39	302	119	16792	3.73799	0.999823	0.616965	8.97814
GOTERM_BP_DIRECT	GO:0030198~extracellular matrix organization	10	2.8169	0.00898421	COL18A1, DDR1, APP, LAMB2, COL7A1, DAG1, HSPG2, COL6A1, SOX9, COL5A2	302	196	16792	2.83687	0.999999	0.748395	13.9548
GOTERM_BP_DIRECT	GO:0048709~oligodendrocyte differentiation	4	1.12676	0.00979468	NOTCH1, ERBB2, SOX9, SOX8	302	25	16792	8.89642	1	0.745428	15.1193
GOTERM_BP_DIRECT	GO:0006621~protein retention in ER lumen	3	0.84507	0.0106087	KDELR3, KDELR2, PDIA2	302	9	16792	18.5342	1	0.74307	16.274
GOTERM_BP_DIRECT	GO:0006413~translational initiation	8	2.25352	0.0118081	RPSA, RPL23, RPL34, RPL15, RPS10, RPL24, RPL23A, RPL39	302	137	16792	3.24687	1	0.752681	17.9483
GOTERM_BP_DIRECT	GO:0043001~Golgi to plasma membrane protein transport	4	1.12676	0.0121333	BBS2, ANK3, VAMP5, RAB26	302	27	16792	8.23743	1	0.736378	18.3969
GOTERM_BP_DIRECT	GO:0046718~viral entry into host cell	6	1.69014	0.0144286	RPSA, EFNB3, VAMP8, CD46, DAG1, CTSB	302	80	16792	4.1702	1	0.772696	21.4976
GOTERM_BP_DIRECT	GO:0007016~cytoskeletal anchoring at plasma membrane	3	0.84507	0.0158294	JUP, ANK3, DAG1	302	11	16792	15.1644	1	0.782335	23.3354
GOTERM_BP_DIRECT	GO:0008544~epidermis development	6	1.69014	0.0183279	KLK7, COL17A1, STS, COL7A1, KRT15, KLK5	302	85	16792	3.92489	1	0.810568	26.513
GOTERM_BP_DIRECT	GO:0001837~epithelial to mesenchymal transition	4	1.12676	0.0226511	S100A4, NOTCH1, CUL7, SOX9	302	34	16792	6.54149	1	0.857186	31.7209
GOTERM_BP_DIRECT	GO:0098609~cell-cell adhesion	11	3.09859	0.0247012	FMNL2, LASP1, CALD1, RPL34, RPL15, USO1, RPL24, CCS, RPL23A, ESYT2, GPRC5A	302	271	16792	2.25693	1	0.866381	34.0674
GOTERM_BP_DIRECT	GO:0006888~ER to Golgi vesicle-mediated transport	8	2.25352	0.0254153	TRAPPC6A, COL7A1, ANK3, USO1, YIF1B, TRAPPC1, SEC24C, NRBP2	302	160	16792	2.78013	1	0.860281	34.8667
GOTERM_BP_DIRECT	GO:0072197~ureter morphogenesis	2	0.56338	0.0355301	SOX9, SOX8	302	2	16792	55.6026	1	0.92821	45.2548
GOTERM_BP_DIRECT	GO:0046777~protein autophosphorylation	8	2.25352	0.0356268	EPHA4, DDR1, FGFR3, CAMK2G, ERBB2, EEF2K, MINK1, PRKCG	302	172	16792	2.58617	1	0.919641	45.3461
GOTERM_BP_DIRECT	GO:0007155~cell adhesion	15	4.22535	0.0379211	COL18A1, RPSA, SPG7, CD99, ACKR3, PCDHGC3, JUP, DDR1, EPHA4, APP, LAMB2, COL7A1, COL6A1, HAS3, THBS3	302	459	16792	1.81708	1	0.923462	47.4717
GOTERM_BP_DIRECT	GO:0006412~translation	10	2.8169	0.0392641	RPSA, SLC25A20, RPL23, SLC25A24, RPL34, RPL15, RPS10, RPL24, RPL23A, RPL39	302	253	16792	2.19773	1	0.922065	48.6796
GOTERM_BP_DIRECT	GO:0033539~fatty acid beta-oxidation using acyl-CoA dehydrogenase	3	0.84507	0.0405634	IVD, ACADS, ETFDH	302	18	16792	9.26711	1	0.920546	49.8233
GOTERM_BP_DIRECT	GO:0006635~fatty acid beta-oxidation	4	1.12676	0.0440343	ECH1, ACADS, ECHDC2, HADHA	302	44	16792	5.05479	1	0.929229	52.7622
GOTERM_BP_DIRECT	GO:0090190~positive regulation of branching involved in ureteric bud morphogenesis	3	0.84507	0.0448101	MAGED1, SOX9, SOX8	302	19	16792	8.77937	1	0.925443	53.3966
GOTERM_BP_DIRECT	GO:0022617~extracellular matrix disassembly	5	1.40845	0.0475694	KLK7, CTSK, BMP1, HSPG2, TIMP2	302	76	16792	3.65807	1	0.930153	55.5887

## Sheet: MIA2-Darkturquoise 271
Table SIII. DAVID GO and KEGG analysis of the different affected genes by statins in MiaPaCa2 and PANC1 cells, including pink, black modules in PANC1 cells and dark-grey, dark-turquoise, green-yellow modules in MiaPaCa2 cells.
Category	Term	Count	%	PValue	Genes	List Total	Pop Hits	Pop Total	Fold Enrichment	Bonferroni	Benjamini	FDR
KEGG_PATHWAY	hsa04064:NF-kappa B signaling pathway	6	2.23881	0.00746805	IRAK1, LTBR, CSNK2A1, CXCL8, TRIM25, BIRC3	98	87	6879	4.84096	0.730669	0.730669	8.7802
KEGG_PATHWAY	hsa03013:RNA transport	8	2.98507	0.0105233	EIF3C, PHAX, EIF4EBP1, POM121, RAE1, EIF2S2, RNPS1, EIF2B2	98	172	6879	3.26483	0.842973	0.603734	12.1636
KEGG_PATHWAY	hsa05230:Central carbon metabolism in cancer	5	1.86567	0.0123798	SLC1A5, FGFR1, HKDC1, TP53, SLC7A5	98	64	6879	5.4839	0.886956	0.516479	14.1627
KEGG_PATHWAY	hsa00970:Aminoacyl-tRNA biosynthesis	5	1.86567	0.0137472	IARS, TARS, WARS, YARS, LARS	98	66	6879	5.31772	0.911295	0.454259	15.6084
KEGG_PATHWAY	hsa00260:Glycine, serine and threonine metabolism	4	1.49254	0.0172124	ALAS1, SHMT2, PHGDH, PSAT1	98	39	6879	7.19937	0.952088	0.455386	19.1725
KEGG_PATHWAY	hsa00670:One carbon pool by folate	3	1.1194	0.031706	MTHFD2, SHMT2, MTHFD1L	98	20	6879	10.5291	0.996442	0.609269	32.6317
Category	Term	Count	%	PValue	Genes	List Total	Pop Hits	Pop Total	Fold Enrichment	Bonferroni	Benjamini	FDR
GOTERM_BP_DIRECT	GO:0043066~negative regulation of apoptotic process	18	6.71642	0.000141604	IRAK1, YWHAZ, PDCD10, TMBIM6, SPHK1, TP53, ASNS, BIRC3, IFIT3, PPIF, SPRY2, DHRS2, DDX3X, BAG1, PRKAA1, SUPV3L1, PRNP, HSPA9	226	455	16792	2.93938	0.157237	0.157237	0.22887
GOTERM_BP_DIRECT	GO:0042149~cellular response to glucose starvation	5	1.86567	0.000572961	TP53, UPP1, PRKAA1, ASNS, PMAIP1	226	29	16792	12.8105	0.499594	0.292606	0.923033
GOTERM_BP_DIRECT	GO:0016032~viral process	13	4.85075	0.000733164	LTBR, CCNT1, TP53, SNW1, KCTD5, RAD50, SF3B2, POM121, FYN, RAE1, IPO5, BRD4, RBM15	226	299	16792	3.23047	0.587693	0.255713	1.17968
GOTERM_BP_DIRECT	GO:0030307~positive regulation of cell growth	7	2.61194	0.000921913	CSNK2A3, CSNK2A1, DDX3X, SPHK1, SUPV3L1, H3F3B, H3F3C	226	84	16792	6.19174	0.671817	0.243117	1.48127
GOTERM_BP_DIRECT	GO:0006564~L-serine biosynthetic process	3	1.1194	0.00105361	SHMT2, PHGDH, PSAT1	226	4	16792	55.7257	0.720132	0.224841	1.69119
GOTERM_BP_DIRECT	GO:0043123~positive regulation of I-kappaB kinase/NF-kappaB signaling	9	3.35821	0.00149177	IRAK1, TNFRSF10B, LTBR, SLC20A1, FYN, CCDC22, TRIM25, BRD4, BIRC3	226	161	16792	4.15347	0.835263	0.259602	2.38655
GOTERM_BP_DIRECT	GO:0046655~folic acid metabolic process	4	1.49254	0.00166938	MTHFD2, SHMT2, FPGS, MTHFD1L	226	18	16792	16.5113	0.867118	0.250484	2.66711
GOTERM_BP_DIRECT	GO:0006418~tRNA aminoacylation for protein translation	5	1.86567	0.00196513	IARS, TARS, WARS, YARS, LARS	226	40	16792	9.28761	0.907098	0.256975	3.1326
GOTERM_BP_DIRECT	GO:0006457~protein folding	9	3.35821	0.00299324	TXNL1, PPIF, GRPEL2, CLGN, CSNK2A1, TXN, SPHK1, PDRG1, HSPA9	226	180	16792	3.71504	0.973251	0.331261	4.73459
GOTERM_BP_DIRECT	GO:0006368~transcription elongation from RNA polymerase II promoter	6	2.23881	0.00597418	ADRM1, GTF2A1, CCNH, CCNT1, TCEA1, PAF1	226	86	16792	5.18378	0.999282	0.515116	9.24008
GOTERM_BP_DIRECT	GO:0006544~glycine metabolic process	3	1.1194	0.00604789	SHMT2, PHGDH, FPGS	226	9	16792	24.767	0.999343	0.486335	9.34891
GOTERM_BP_DIRECT	GO:0006730~one-carbon metabolic process	4	1.49254	0.00738126	MTHFD2, SHMT2, FPGS, MTHFD1L	226	30	16792	9.90678	0.99987	0.525647	11.2966
GOTERM_BP_DIRECT	GO:0046653~tetrahydrofolate metabolic process	3	1.1194	0.00749343	MTHFD2, SHMT2, MTHFD1L	226	10	16792	22.2903	0.999887	0.502885	11.4587
GOTERM_BP_DIRECT	GO:0046902~regulation of mitochondrial membrane permeability	3	1.1194	0.00749343	PPIF, TP53, PMAIP1	226	10	16792	22.2903	0.999887	0.502885	11.4587
GOTERM_BP_DIRECT	GO:0042981~regulation of apoptotic process	9	3.35821	0.0081286	TNFRSF10B, AIFM2, FYN, ETS1, ROBO4, TP53, SKIL, PMAIP1, BIRC3	226	213	16792	3.13947	0.999948	0.50552	12.371
GOTERM_BP_DIRECT	GO:0015804~neutral amino acid transport	3	1.1194	0.0126499	SLC1A5, SLC38A1, SLC7A5	226	13	16792	17.1464	1	0.641289	18.6152
GOTERM_BP_DIRECT	GO:0009615~response to virus	6	2.23881	0.0162511	BATF3, IFIT3, IFIT2, OASL, DDX3X, FOSL1	226	110	16792	4.05278	1	0.709757	23.2874
GOTERM_BP_DIRECT	GO:0006450~regulation of translational fidelity	3	1.1194	0.0167322	IARS, LARS, DTD1	226	15	16792	14.8602	1	0.698514	23.8922
GOTERM_BP_DIRECT	GO:0051607~defense response to virus	7	2.61194	0.0239095	IFIT3, PLSCR1, IFIT2, OASL, ISG15, TRIM25, PMAIP1	226	165	16792	3.15216	1	0.802909	32.3997
GOTERM_BP_DIRECT	GO:0008284~positive regulation of cell proliferation	13	4.85075	0.0239194	FGFR1, SHMT2, CHTOP, PDCD10, CNOT6, LIF, CSNK2A3, CSNK2A1, CTGF, ETS1, PRKAA1, FOSL1, SERTAD1	226	466	16792	2.07277	1	0.785459	32.4108
GOTERM_BP_DIRECT	GO:0008637~apoptotic mitochondrial changes	3	1.1194	0.0263121	PPIF, IFIT2, AIFM2	226	19	16792	11.7317	1	0.800219	35.0422
GOTERM_BP_DIRECT	GO:0043011~myeloid dendritic cell differentiation	3	1.1194	0.0263121	BATF3, DHRS2, LTBR	226	19	16792	11.7317	1	0.800219	35.0422
GOTERM_BP_DIRECT	GO:0009116~nucleoside metabolic process	3	1.1194	0.0263121	UPP1, FPGS, PNP	226	19	16792	11.7317	1	0.800219	35.0422
GOTERM_BP_DIRECT	GO:0061614~pri-miRNA transcription from RNA polymerase II promoter	2	0.746269	0.0266197	ETS1, FOSL1	226	2	16792	74.3009	1	0.78818	35.3735
GOTERM_BP_DIRECT	GO:0001525~angiogenesis	8	2.98507	0.0309632	FGFR1, WARS, ZNF304, PDCD10, CTGF, AAMP, ROBO4, CXCL8	226	223	16792	2.6655	1	0.82219	39.8847
GOTERM_BP_DIRECT	GO:2001243~negative regulation of intrinsic apoptotic signaling pathway	3	1.1194	0.0346268	PPIF, DDX3X, PARL	226	22	16792	10.1319	1	0.842903	43.4584
GOTERM_BP_DIRECT	GO:0006405~RNA export from nucleus	4	1.49254	0.0374146	SARNP, CHTOP, POM121, RNPS1	226	55	16792	5.4037	1	0.853295	46.0431
GOTERM_BP_DIRECT	GO:0060368~regulation of Fc receptor mediated stimulatory signaling pathway	2	0.746269	0.0396638	PLSCR1, RABGEF1	226	3	16792	49.5339	1	0.858521	48.0473
GOTERM_BP_DIRECT	GO:0071456~cellular response to hypoxia	5	1.86567	0.0401336	IRAK1, EIF4EBP1, TP53, PRKAA1, PMAIP1	226	96	16792	3.86984	1	0.850897	48.457
GOTERM_BP_DIRECT	GO:0006915~apoptotic process	14	5.22388	0.042245	YARS, LTBR, DFFA, TP53, PMAIP1, BIRC3, PTRH2, PLSCR1, CSNK2A1, GHITM, TNFRSF10B, BAG1, CSRNP1, EBAG9	226	567	16792	1.83459	1	0.85502	50.2612
GOTERM_BP_DIRECT	GO:0006351~transcription, DNA-templated	36	13.4328	0.0452271	FGFR1, TADA3, CCNT1, ASCC1, CNOT6, PCGF5, ZNF304, CSNK2A1, DDX3X, CGGBP1, MED26, ZNF286A, PRKAA1, TCEA1, RNF10, BRD4, LRRFIP1, ZSCAN29, GTF3C4, SERTAD1, KHDRBS3, CCNH, ZNF621, TP53, HES7, IRF2BP2, RNPS1, CDC5L, HNRNPDL, ZNF627, PWP1, BAZ1B, ZSCAN32, TXN, ZBTB2, ZNF256	226	1955	16792	1.3682	1	0.864221	52.7086
GOTERM_BP_DIRECT	GO:0006406~mRNA export from nucleus	5	1.86567	0.0454902	SARNP, CHTOP, POM121, RAE1, RNPS1	226	100	16792	3.71504	1	0.856204	52.919

## Sheet: MIA2-Greenyellow 1575
Table SIII. DAVID GO and KEGG analysis of the different affected genes by statins in MiaPaCa2 and PANC1 cells, including pink, black modules in PANC1 cells and dark-grey, dark-turquoise, green-yellow modules in MiaPaCa2 cells.
Category	Term	Count	%	PValue	Genes	List Total	Pop Hits	Pop Total	Fold Enrichment	Bonferroni	Benjamini	FDR
KEGG_PATHWAY	hsa04141:Protein processing in endoplasmic reticulum	35	2.25225	3.55699e-07	SEC24B, RAD23A, RNF185, DNAJC10, DNAJB12, EDEM2, UBQLN1, PLAA, HSPH1, BAK1, UBE2D3, UBE2D2, XBP1, FBXO6, HSPA5, SAR1B, DNAJC3, SAR1A, SEC61A1, HSPA8, DNAJA2, NSFL1C, ATF6, ATXN3, ATF4, SEC61B, EIF2S1, BAX, ERN1, AMFR, DNAJB1, NFE2L2, PPP1R15A, SSR3, SEL1L	552	169	6879	2.58088	8.89208e-05	8.89208e-05	0.000462086
KEGG_PATHWAY	hsa04144:Endocytosis	40	2.574	1.46586e-05	RAB7A, PARD3, CLTB, LDLR, RAB5C, TSG101, CHMP4B, CHMP4A, ASAP2, VPS37A, ASAP1, PIP5K1A, CHMP2B, SH3GLB1, DNAJC6, HSPA8, EHD4, FAM21C, KIF5B, FAM21A, CBL, SMAD2, CHMP1B, ARF1, NEDD4, RAB35, IGF2R, RAB22A, RAB5A, SH3KBP1, HGS, WASL, SMURF1, PDCD6IP, RAB10, SNX12, BIN1, VPS25, SH3GL1, RNF41	552	241	6879	2.06837	0.00365797	0.00183066	0.0190412
KEGG_PATHWAY	hsa04330:Notch signaling pathway	12	0.772201	0.00115521	DVL2, HES1, NOTCH2, CIR1, EP300, APH1A, PSEN1, DTX2, CREBBP, APH1B, PSENEN, DVL1	552	48	6879	3.11549	0.250964	0.0918293	1.49038
KEGG_PATHWAY	hsa04722:Neurotrophin signaling pathway	20	1.287	0.00298104	IRAK2, ZNF274, BRAF, NFKBIE, NFKBIB, RELA, NFKBIA, PRKCD, MAPK1, ATF4, PSEN1, MAP3K3, PRDM4, RPS6KA2, GSK3B, BAX, RIPK2, RAP1B, NGFR, CRK	552	120	6879	2.07699	0.525917	0.170219	3.80419
KEGG_PATHWAY	hsa05110:Vibrio cholerae infection	11	0.707851	0.00733508	ATP6V0C, SEC61B, ARF1, ATP6V1E1, ATP6V1G1, ATP6V0D1, ATP6V1D, SEC61A1, ATP6V0A2, ATP6V0B, ATP6V1F	552	52	6879	2.63618	0.841267	0.307956	9.12097
KEGG_PATHWAY	hsa03008:Ribosome biogenesis in eukaryotes	15	0.965251	0.00874607	RPP38, EIF6, UTP6, NOB1, NOP10, RIOK2, CSNK2A2, SBDS, LSG1, GNL2, UTP14A, WDR43, UTP14C, XRN2, NMD3	552	87	6879	2.14861	0.888768	0.306513	10.7849
KEGG_PATHWAY	hsa05134:Legionellosis	11	0.707851	0.00960702	ARF1, CXCL3, RELA, HBS1L, CXCL2, NFKBIA, NFKB2, BCL2L13, SAR1B, SAR1A, HSPA8	552	54	6879	2.53855	0.910487	0.291614	11.7863
KEGG_PATHWAY	hsa04721:Synaptic vesicle cycle	12	0.772201	0.0105509	ATP6V0C, STX1A, CLTB, STX3, ATP6V1E1, NAPA, ATP6V1G1, ATP6V0D1, ATP6V1D, ATP6V0A2, ATP6V0B, ATP6V1F	552	63	6879	2.37371	0.929472	0.28213	12.8722
KEGG_PATHWAY	hsa03010:Ribosome	20	1.287	0.0116656	MRPL2, RPL18, MRPS16, RPL19, RPL13, MRPS12, RPL36, MRPS2, MRPL10, RPS27, MRPL15, RPLP0, RPLP1, MRPL18, RPL10, FAU, RPL10A, RPS21, MRPL34, RPL36AL	552	136	6879	1.83264	0.946792	0.278159	14.1388
KEGG_PATHWAY	hsa04130:SNARE interactions in vesicular transport	8	0.514801	0.0163182	SNAP29, STX5, STX1A, STX4, STX3, BNIP1, GOSR2, YKT6	552	34	6879	2.93223	0.983645	0.337226	19.244
KEGG_PATHWAY	hsa04966:Collecting duct acid secretion	7	0.45045	0.0177994	ATP6V0C, ATP6V1E1, ATP6V1G1, ATP6V0D1, ATP6V1D, ATP6V0A2, ATP6V1F	552	27	6879	3.23088	0.988778	0.335137	20.8095
KEGG_PATHWAY	hsa04152:AMPK signaling pathway	18	1.1583	0.0182134	IRS2, CREB3, PFKFB2, PPARG, PRKAG2, EEF2, SIRT1, CPT1A, AKT1S1, PPP2CA, PPP2CB, CREB3L2, FASN, RHEB, CAB39, MTOR, RAB10, PPP2R2C	552	123	6879	1.8237	0.989901	0.318149	21.242
KEGG_PATHWAY	hsa03050:Proteasome	9	0.579151	0.0217935	PSMF1, PSMB4, PSMB7, PSMC5, PSMA5, PSMD4, PSME4, PSMD7, PSMD8	552	44	6879	2.54904	0.995948	0.345406	24.8924
KEGG_PATHWAY	hsa04010:MAPK signaling pathway	30	1.9305	0.030542	MRAS, MAPKAPK5, GNA12, PPM1A, MAPKAPK3, NFKB2, MAX, MAP3K3, RAPGEF2, MYC, FGF2, HSPA8, BRAF, TAOK1, CACNG8, RELA, RELB, NF1, FLNC, MAP4K4, MAPK1, ATF4, RPS6KA2, GADD45G, MAPK8IP2, RAP1B, GADD45B, GADD45A, CRK, DUSP7	552	253	6879	1.4777	0.999571	0.425293	33.1658
KEGG_PATHWAY	hsa05166:HTLV-I infection	30	1.9305	0.0319688	CRTC3, TLN1, XIAP, MRAS, NFKBIA, NFKB2, TRRAP, ATF1, MAP3K3, XBP1, MYC, DVL2, VAC14, RELA, SLC25A6, CREBBP, RELB, SMAD4, SMAD2, FZD5, VDAC2, DVL1, GPS2, ATF4, ATF3, EP300, ETS2, GSK3B, BAX, JAK1	552	254	6879	1.47188	0.999703	0.418134	34.4324
KEGG_PATHWAY	hsa03013:RNA transport	22	1.4157	0.0334733	RPP38, XPOT, ELAC2, STRAP, XPO5, PAIP1, FMR1, EIF5, SAP18, EIF1B, FXR2, FXR1, EIF4G1, EIF3D, EIF4G3, EIF3A, EIF3G, EIF2S1, EIF3F, EIF1, EIF3I, NMD3	552	172	6879	1.59397	0.999799	0.412556	35.744
KEGG_PATHWAY	hsa04666:Fc gamma R-mediated phagocytosis	13	0.836551	0.0344476	LIMK2, LIMK1, ASAP2, ASAP1, PIP5K1A, VAV2, PRKCD, VASP, MAPK1, GAB2, WASL, BIN1, CRK	552	84	6879	1.92864	0.999844	0.402806	36.5804
KEGG_PATHWAY	hsa04350:TGF-beta signaling pathway	13	0.836551	0.0344476	INHBB, MAPK1, EP300, SMAD7, PPP2CA, PPP2CB, CREBBP, SMAD4, TGIF1, SMAD2, SMURF1, MYC, ACVR1	552	84	6879	1.92864	0.999844	0.402806	36.5804
KEGG_PATHWAY	hsa04931:Insulin resistance	15	0.965251	0.048611	IRS2, CREB3, RELA, PRKAG2, NFKBIA, TRIB3, PRKCD, CPT1A, NR1H2, RPS6KA2, GFPT1, GSK3B, CREB3L2, MTOR, SLC27A4	552	108	6879	1.73083	0.999996	0.499483	47.6579
Category	Term	Count	%	PValue	Genes	List Total	Pop Hits	Pop Total	Fold Enrichment	Bonferroni	Benjamini	FDR
GOTERM_BP_DIRECT	GO:0098609~cell-cell adhesion	55	3.53925	2.16701e-10	RTN4, CAST, ZC3HAV1, CHMP4B, EIF5, H1FX, EIF2A, LARP1, BAG3, SND1, LRRC59, CLINT1, STX5, KIF5B, STK24, BAIAP2, SLC3A2, EEF2, VASP, ELMO2, MARK2, EIF4G1, SDCBP, MAPRE1, RAB10, ERC1, DBN1, SH3GL1, SNX9, ASAP1, GIPC1, ABI1, SFN, CHMP2B, CDC42EP1, ATXN2L, SH3GLB1, FASN, IDH1, EXOC3, CC2D1A, HSPA5, EMD, HSPA8, EHD4, S100P, CBL, S100A11, MICALL1, CSNK1D, DNAJB1, AHSA1, YKT6, HIST1H3H, SPTAN1	1334	271	16792	2.5547	8.44049e-07	8.44049e-07	4.0155e-07
GOTERM_BP_DIRECT	GO:0043161~proteasome-mediated ubiquitin-dependent protein catabolic process	42	2.7027	2.14545e-08	RAD23A, RNF216, RNF187, RFFL, CDC34, RLIM, PLAA, PSMB4, PSMF1, PSMB7, UBE2D3, PCBP2, PPP2CB, RNF38, RBCK1, PSMD4, FBXW11, PSMD7, PSMD8, PSMD9, CSNK1A1, UBXN1, UBE2A, NSFL1C, KCTD2, SIRT1, BTBD9, RNF6, ATXN3, RNF44, PSMC5, RNF115, PSMA5, GSK3A, UBE2K, GSK3B, UBC, KLHL11, PSME4, SMURF1, FAF1, NFE2L2	1334	203	16792	2.60435	8.35618e-05	4.17818e-05	3.97555e-05
GOTERM_BP_DIRECT	GO:0000209~protein polyubiquitination	37	2.38095	3.49291e-07	RUSC1, CDC34, RLIM, PSMB4, PSMF1, ARIH1, PSMB7, UBE2D3, UBE2D2, FBXO6, RBCK1, RC3H2, ANKIB1, PSMD4, LONRF1, PSMD7, FBXW11, RNF14, PSMD8, TRIP12, PSMD9, UBE2A, TNKS2, RNF114, TRIM36, PSMC5, RNF115, HUWE1, PSMA5, UBC, FBXO31, FBXL4, AMFR, PSME4, SMURF1, CHFR, RNF41	1334	184	16792	2.53122	0.00135956	0.000453393	0.000647239
GOTERM_BP_DIRECT	GO:0006914~autophagy	29	1.86615	1.51738e-06	C9ORF72, CHMP4B, TSG101, CHMP4A, ATG101, RNF185, VPS37A, SESN2, CHMP2B, ANXA7, SH3GLB1, SQSTM1, XBP1, RB1CC1, VPS18, BECN1, WIPI1, TMEM208, TBC1D25, NPC1, BNIP1, MAP1S, HGS, CTSD, MTOR, DRAM1, WDR45, RNF41, VPS25	1334	133	16792	2.74469	0.00589277	0.00147646	0.00281169
GOTERM_BP_DIRECT	GO:0016567~protein ubiquitination	54	3.4749	7.9221e-06	SH3RF1, RLIM, KLHL2, TRIM4, KLHL29, TRIM2, KLHL5, TRIM8, DCAF10, RNF38, KLHL21, VCPIP1, RNF220, SOCS2, GAN, BRAP, MED10, DCAF4, DCAF7, KLHL18, MED8, NFE2L2, NEURL3, MED1, ASB6, TRIML2, XIAP, KEAP1, CDC34, CBLL1, FEM1B, TRIM11, ARIH1, UBE2D3, UBE2D2, FBXW11, RNF14, TRAF4, FBXO7, CCNB1IP1, NUB1, DTX2, CBL, MUL1, SIRT1, TSPAN17, ATG3, RNF44, UVSSA, NEDD4, FBXO30, TRPC4AP, SH3RF2, SMURF1	1334	359	16792	1.89342	0.0303855	0.00615234	0.0146788
GOTERM_BP_DIRECT	GO:0006413~translational initiation	28	1.8018	8.57968e-06	EIF6, RPL18, RPL19, RPL13, EIF5, RPL36, EIF2A, LARP1, EIF3D, EIF3A, RPS27, EIF3G, RPLP0, EIF3F, RPLP1, EIF3K, FAU, RPL10, EIF3L, EIF3I, EIF1, RPL10A, RPS21, PAIP1, EIF1B, EIF4G1, EIF4G3, EIF2S1	1334	137	16792	2.57267	0.0328658	0.00555418	0.0158971
GOTERM_BP_DIRECT	GO:0036498~IRE1-mediated unfolded protein response	17	1.09395	9.42528e-06	TLN1, MYDGF, SRPRB, WIPI1, DNAJB9, SEC61B, XBP1, GSK3A, GFPT1, ERN1, GOSR2, HSPA5, DNAJC3, ATP6V0D1, ASNA1, SEC61A1, SERP1	1334	59	16792	3.62697	0.0360459	0.00523079	0.0174637
GOTERM_BP_DIRECT	GO:0006915~apoptotic process	75	4.82625	1.39278e-05	RTN4, STEAP3, SH3RF1, HTATIP2, RNF216, SMNDC1, PDCD2, CSNK2A2, UNC5B, TNIP2, BCL7B, BCL10, OPA1, SLC25A6, PIM1, BCL2L13, PRKCD, ELMO2, NME6, MFN2, TNFRSF9, MAPK1, TRIM35, EP300, BNIP1, RIPK1, GADD45G, MAP3K10, SH3KBP1, RIPK2, CDK11B, PDCD6IP, GADD45B, PPP1R15A, GADD45A, TRAF1, PACS2, XIAP, GULP1, MYDGF, NFKBIA, BEX2, RFFL, FEM1B, GLRX2, PLAGL1, ZFP36L1, PEA15, UBE2D3, SH3GLB1, SQSTM1, PPP2CA, ZC3…	1334	567	16792	1.66504	0.0528038	0.00675819	0.0258052
GOTERM_BP_DIRECT	GO:0006511~ubiquitin-dependent protein catabolic process	33	2.12355	1.59515e-05	USP9X, RFFL, RLIM, PSMF1, ARIH1, CYLD, UBE2D3, UBE2D2, SQSTM1, XBP1, FBXW4, USP38, PSMD4, USP36, USP15, USP14, FBXO7, USP31, PSMD9, UBE2A, USP40, NUB1, RNF6, ATXN3, UBE2K, TRPC4AP, USP20, FBXL4, UCHL3, AMFR, USP25, CHFR, USP24	1334	182	16792	2.28239	0.0602407	0.00687972	0.0295542
GOTERM_BP_DIRECT	GO:0070059~intrinsic apoptotic signaling pathway in response to endoplasmic reticulum stress	12	0.772201	2.85236e-05	BAK1, ATF4, CEBPB, UBE2K, XBP1, CHAC1, BAX, GSK3B, ERN1, DNAJC10, TRIB3, PPP1R15A	1334	33	16792	4.57735	0.105152	0.0110486	0.0528413
GOTERM_BP_DIRECT	GO:0032436~positive regulation of proteasomal ubiquitin-dependent protein catabolic process	17	1.09395	2.87356e-05	CSNK1A1, CEBPA, GCLC, NUB1, SMAD7, TRIB3, KEAP1, DVL1, ARIH1, RNF114, CSNK1D, PSEN1, ZFAND2A, GSK3B, ANKIB1, CHFR, RNF14	1334	64	16792	3.34361	0.10589	0.0101236	0.0532341
GOTERM_BP_DIRECT	GO:0043065~positive regulation of apoptotic process	45	2.89575	5.34057e-05	ING3, CYP1B1, APH1A, TNFRSF12A, ZMAT3, APH1B, OSGIN1, LATS1, PDCD2, BAK1, SQSTM1, HMOX1, PSENEN, PHLDA3, ZNF622, ARHGEF2, KLF11, NF1, SAP18, VAV2, ARHGEF12, SIRT1, ARHGEF11, ATF6, TRIM35, ATF4, NCOA1, IRF5, PSEN1, NUPR1, RPS6KA2, BAX, RIPK1, IGF2R, GADD45G, MAP3K10, UBC, RIPK2, NGFR, FAF1, BIN1, GADD45B, APBB2, GADD45A, SLC9A1	1334	300	16792	1.88816	0.18781	0.0171857	0.0989151
GOTERM_BP_DIRECT	GO:0006351~transcription, DNA-templated	201	12.9344	6.53363e-05	EPC1, ZNF777, BRPF1, ZNF775, PQBP1, SAP30L, TADA2B, ZNF503, MED19, HES1, MAPK1, ZNF787, HES4, ZNF384, TGIF1, PRDM2, ATXN1L, CRTC3, ZNF79, NFKBIB, XAB2, NR1H2, PLAGL1, AHRR, ATN1, SUPT7L, ZNF398, KLF6, KLF7, ESRRA, SMAD7, SRA1, SMAD4, KLF16, ZBTB40, SMAD2, SFMBT1, ZNF585B, SAP130, ETS2, PPRC1, ZNF385A, CREBRF, ZNF18, ZBTB34, ZFP41, VIPAS39, ZNF296, PPARG, ZBTB39, CRCP, ZEB1, RLIM, ACTR8, ZNF496, D…	1334	1955	16792	1.29418	0.224691	0.019386	0.121
GOTERM_BP_DIRECT	GO:0006446~regulation of translational initiation	12	0.772201	7.09277e-05	EIF4G1, EIF3D, EIF4G3, EIF3A, EIF3G, EIF5, EIF3F, EIF3K, EIF3L, EIF1, EIF3I, EIF1B	1334	36	16792	4.1959	0.241394	0.0195404	0.131348
GOTERM_BP_DIRECT	GO:0016032~viral process	44	2.8314	0.000101944	CRTC3, PACS2, ZMYND11, TLN1, HTATIP2, RAD23A, RBM15B, NFKBIA, CALCOCO2, C14ORF166, RNF216, ABI1, ATP6V0C, PSMB4, ANKRD17, PSMB7, VRK2, KLC1, SND1, RBCK1, RALA, ZYX, TNPO1, HSPA8, CDK13, ATF7IP, CEBPA, VAC14, CREB3, CREBBP, UBR4, UBN1, SIRT1, SGTA, NCKAP1, EIF4G1, MAPK1, EIF4G3, EP300, BAX, ATF7, BIN1, SRCAP, C9ORF69	1334	299	16792	1.85237	0.327729	0.0261256	0.188736
GOTERM_BP_DIRECT	GO:0000226~microtubule cytoskeleton organization	17	1.09395	0.000110946	SPECC1L, MAP1B, TBCE, CAMSAP3, FER, MARK3, TACC1, TTL, MARK2, TACC2, SON, ATXN3, MAP1S, MAP2, PAFAH1B1, MAP7, ZPR1	1334	71	16792	3.01396	0.350894	0.0266484	0.205385
GOTERM_BP_DIRECT	GO:0016192~vesicle-mediated transport	27	1.73745	0.000153458	MYO5A, STX5, SEC24B, GDI2, STX4, STX1A, VPS18, CLTB, RAB39B, AP3S2, SPIRE1, TRAPPC12, NCK2, TRAPPC11, BLZF1, CHMP1A, KXD1, ACTR1A, AP3D1, GOSR2, RAB10, SAR1B, YKT6, CLINT1, SAR1A, MON1B, MON1A	1334	152	16792	2.23597	0.449961	0.0345517	0.283978
GOTERM_BP_DIRECT	GO:0002223~stimulatory C-type lectin receptor signaling pathway	21	1.35135	0.000197784	BCL10, RELA, CREBBP, RELB, NFKBIA, PRKCD, TAB3, PSMB4, PSMF1, PSMB7, PSMC5, EP300, UBE2D2, PSMA5, UBC, PSMD4, PSME4, PSMD7, FBXW11, PSMD8, PSMD9	1334	105	16792	2.51754	0.537192	0.0418993	0.365861
GOTERM_BP_DIRECT	GO:0030433~ER-associated ubiquitin-dependent protein catabolic process	15	0.965251	0.000198638	KIAA0368, RNF185, DNAJC10, UBQLN1, EDEM2, PSMC5, SEC61B, DNAJB9, FBXO6, TMUB1, FAF2, HSPA5, AMFR, AUP1, SEL1L	1334	60	16792	3.14693	0.53873	0.0399067	0.367439
GOTERM_BP_DIRECT	GO:0006950~response to stress	15	0.965251	0.000239223	CGRRF1, MAPKAPK3, SMG1, ATF6, MAPK1, NDRG4, SQSTM1, GADD45G, AKR1B1, EIF1, MTOR, GADD45B, AHSA1, GADD45A, SERP1	1334	61	16792	3.09534	0.606189	0.0455254	0.442355
GOTERM_BP_DIRECT	GO:0033572~transferrin transport	11	0.707851	0.000279679	ATP6V0C, STEAP3, ATP6V1E1, LMTK2, MCOLN1, ATP6V1G1, ATP6V0D1, ATP6V1D, ATP6V0A2, ATP6V0B, ATP6V1F	1334	35	16792	3.95614	0.663616	0.0505581	0.51698
GOTERM_BP_DIRECT	GO:0043488~regulation of mRNA stability	20	1.287	0.000432309	ZC3H14, RBM24, FMR1, EXOSC1, PRKCD, EIF4G1, ZFP36L1, PSMF1, PSMB4, PSMB7, PSMC5, PSMA5, UBC, PSMD4, PSME4, PSMD7, TNPO1, PSMD8, HSPA8, PSMD9	1334	103	16792	2.44421	0.814408	0.0736979	0.798046
GOTERM_BP_DIRECT	GO:0000165~MAPK cascade	38	2.4453	0.000434473	NDST1, MAPKAPK5, MAPKAPK3, PAQR3, SETX, RASAL2, ZFP36L1, PEA15, PSMB4, PSMF1, PSMB7, MAP3K3, PSMD4, RAPGEF2, MYC, PSMD7, FGF2, PSMD8, PSMD9, IRS2, BRAF, NF1, MARK3, BRAP, RHBDD3, WDR83, MAPK1, MEF2D, PSMC5, MAPK6, EREG, PSMA5, MAPK8IP2, UBC, JAK1, PSME4, DUSP7, SPTAN1	1334	262	16792	1.8257	0.815967	0.0709503	0.802026
GOTERM_BP_DIRECT	GO:0036258~multivesicular body assembly	10	0.643501	0.000493797	CHMP1A, CHMP1B, TSG101, CHMP4B, CHMP4A, VPS37A, HGS, PDCD6IP, VPS25, CHMP2B	1334	31	16792	4.06055	0.853951	0.0770304	0.911063
GOTERM_BP_DIRECT	GO:0016241~regulation of macroautophagy	12	0.772201	0.000502185	ATP6V0C, CAPNS1, NEDD4, SH3GLB1, EXOC8, ATP6V1E1, ERN1, ATP6V1G1, ATP6V0D1, ATP6V1D, ATP6V0A2, ATP6V0B	1334	44	16792	3.43301	0.858648	0.0752761	0.926472
GOTERM_BP_DIRECT	GO:0006886~intracellular protein transport	35	2.25225	0.0005058	SNX9, SEC24B, CLTB, NAPG, VIPAS39, SNX8, TIMM17B, AP3S2, DSCR3, NAPA, KLC1, AP3D1, TLK1, SAR1B, TNPO1, SAR1A, SEC23IP, ASPSCR1, XPOT, STX5, ARHGEF2, VPS18, STX1A, STX4, STX3, IPO13, EXPH5, TBC1D22B, TBC1D25, SEC61B, TOM1L1, ARCN1, HGS, SLU7, NGFR	1334	236	16792	1.86682	0.860625	0.0729909	0.933111
GOTERM_BP_DIRECT	GO:0038061~NIK/NF-kappaB signaling	15	0.965251	0.000566225	RELB, NFKB2, PSMF1, PSMB4, PSMB7, PSMC5, PSMA5, UBC, PSMD4, PSME4, PPP4C, PSMD7, FBXW11, PSMD8, PSMD9	1334	66	16792	2.86084	0.889867	0.0784574	1.04403
GOTERM_BP_DIRECT	GO:0034976~response to endoplasmic reticulum stress	16	1.0296	0.000704804	CREBRF, DDRGK1, CEBPB, CREB3, DNAJC10, TRIB3, EEF2, UBQLN1, ATF4, XBP1, EIF2S1, PPP2CB, ERN1, CREB3L2, FAM129A, PPP1R15A	1334	75	16792	2.68538	0.935828	0.0934217	1.29798
GOTERM_BP_DIRECT	GO:0090383~phagosome acidification	9	0.579151	0.000872548	ATP6V0C, RAB7A, ATP6V1E1, ATP6V1G1, ATP6V0D1, ATP6V1D, ATP6V0A2, ATP6V0B, ATP6V1F	1334	27	16792	4.1959	0.966629	0.110631	1.60454
GOTERM_BP_DIRECT	GO:0007034~vacuolar transport	7	0.45045	0.000988134	CHMP1A, CHMP1B, CHMP4B, CHMP4A, NDFIP1, ATP6V0D1, CHMP2B	1334	16	16792	5.50712	0.978735	0.12046	1.81525
GOTERM_BP_DIRECT	GO:0043162~ubiquitin-dependent protein catabolic process via the multivesicular body sorting pathway	7	0.45045	0.000988134	RNF115, TOM1L1, TSG101, NEDD4, NDFIP1, VPS37A, UBAP1	1334	16	16792	5.50712	0.978735	0.12046	1.81525
GOTERM_BP_DIRECT	GO:0000045~autophagosome assembly	11	0.707851	0.00110289	GABARAPL3, PACS2, PSEN1, BECN1, RB1CC1, ATG101, UBQLN1, WIPI2, ATG3, WIPI1, WDR45	1334	41	16792	3.37719	0.986406	0.129467	2.02404
GOTERM_BP_DIRECT	GO:0039702~viral budding via host ESCRT complex	8	0.514801	0.00115091	CHMP1A, CHMP1B, TSG101, CHMP4B, CHMP4A, VPS37A, PDCD6IP, CHMP2B	1334	22	16792	4.57735	0.988727	0.130787	2.11127
GOTERM_BP_DIRECT	GO:0006355~regulation of transcription, DNA-templated	152	9.78121	0.00123364	ZNF583, RBM15B, ZXDB, CSNK2A2, KDM1B, RCBTB1, ZNF777, AKAP17A, ZNF775, SND1, RNF38, PQBP1, ZNF442, ZNF579, SAP30L, ZNF574, ZNF503, HES6, HES1, ZNF787, EP300, PRDM4, HES4, ZNF384, TGIF1, EDF1, PRDM2, DNTTIP2, AKAP8, ERC1, XRN2, CNBP, ZNF79, SETD1B, SETD1A, KEAP1, TRRAP, NR2C2, AHRR, ZNF425, BTF3, ZNF426, SUPT7L, RNF14, ZNF398, KAT8, ESRRA, SMAD7, CREBBP, SRA1, SMAD4, ZBTB40, SFMBT1, ZNF585B, NOTCH…	1334	1504	16792	1.27216	0.991836	0.13558	2.2614
GOTERM_BP_DIRECT	GO:0000122~negative regulation of transcription from RNA polymerase II promoter	81	5.21236	0.00129962	CREBRF, ZNF296, PPARG, CBX4, ZEB1, NFKB2, RLIM, ZNF205, CBX6, EPC1, WWC3, ZNF496, MYC, AKIRIN2, ZNF281, ATF7IP, ZNF593, ZNF280C, BEND3, RELA, RELB, TLE1, HES6, MXD1, RBBP8, HES1, EP300, NCOA2, PSEN1, UBC, TGIF1, ZNF746, ATXN1L, ZFPM1, MED1, ZMYND11, MTDH, STRAP, USP9X, PPM1A, TRIB3, ARHGAP35, NR1H2, MINA, UBE2D3, AHRR, NR1D1, ATN1, NRARP, XBP1, SQSTM1, GATAD2A, HINFP, CC2D1A, MEPCE, ETV3, CEBPA, …	1334	720	16792	1.41612	0.993688	0.138414	2.38098
GOTERM_BP_DIRECT	GO:0045944~positive regulation of transcription from RNA polymerase II promoter	105	6.75676	0.00133914	LMO4, CASK, SETX, EPC1, NLRC5, CREB3L2, AKIRIN2, PID1, RELA, RELB, MED10, HES1, MED19, EP300, MTF1, CAMK1, RIPK2, NFE2L1, NFE2L2, CRTC3, CAMTA2, CNBP, HAX1, TFE3, NFKBIA, C14ORF166, NR2C2, ATF1, NR1H2, PLAGL1, AHRR, TFDP2, PLAGL2, MAFG, MAFF, ESRRA, CCPG1, SMAD7, TAF7, CREBBP, AKAP8L, SMAD4, SMAD2, TEAD3, DDX5, USF1, USF2, SREBF2, ATF6, ATF5, DLX2, TET3, ATF4, ATF3, EBF4, ETS2, PPRC1, KLF4, SLC9A…	1334	981	16792	1.34731	0.99459	0.13854	2.45253
GOTERM_BP_DIRECT	GO:0001731~formation of translation preinitiation complex	8	0.514801	0.00154219	EIF3D, EIF3A, EIF3G, EIF5, EIF3F, EIF3K, EIF3L, EIF3I	1334	23	16792	4.37833	0.99755	0.153788	2.8194
GOTERM_BP_DIRECT	GO:1990440~positive regulation of transcription from RNA polymerase II promoter in response to endoplasmic reticulum stress	6	0.3861	0.00154288	ATF6, ATF4, ATF3, CEBPB, XBP1, HSPA5	1334	12	16792	6.29385	0.997556	0.150022	2.82064
GOTERM_BP_DIRECT	GO:0006357~regulation of transcription from RNA polymerase II promoter	54	3.4749	0.00156569	HTATIP2, ZNF18, FOXK2, ZEB1, NFKB2, BUD31, ZKSCAN2, BLZF1, TRAK2, NFKBIZ, ZNF354A, TADA2B, ARID5A, RELB, GMEB1, UBN1, RBBP8, MTF1, SMARCE1, MED8, NFE2L1, SRCAP, SUPT3H, CAMTA2, ZNF274, ATF1, PLAGL1, CIR1, TFDP2, CHD1, VEZF1, RNF14, ETV3, MAFG, MAFF, KLF7, BRD2, BRD3, CEBPG, SAP18, TEAD3, DDX5, USF1, FOXP4, ATF6, ATF5, ATF4, ATF3, IRF5, NUPR1, SP2, ZBED4, PRKAR1A, CRK	1334	441	16792	1.54135	0.997764	0.148375	2.86177
GOTERM_BP_DIRECT	GO:0016197~endosomal transport	14	0.900901	0.00180964	AP5Z1, ALS2, SNX9, CHMP4B, TSG101, CHMP4A, VPS37A, CHMP2B, SQSTM1, RAB35, UBC, HGS, RAB10, VPS25	1334	66	16792	2.67012	0.999137	0.165477	3.30062
GOTERM_BP_DIRECT	GO:0006521~regulation of cellular amino acid metabolic process	12	0.772201	0.00186734	ODC1, PSMF1, PSMB4, PSMB7, PSMC5, PSMA5, AZIN1, PSMD4, PSME4, PSMD7, PSMD8, PSMD9	1334	51	16792	2.96181	0.999311	0.1664	3.40415
GOTERM_BP_DIRECT	GO:0006990~positive regulation of transcription from RNA polymerase II promoter involved in unfolded protein response	4	0.2574	0.0018782	ATF6, EP300, CREB3, XBP1	1334	4	16792	12.5877	0.999339	0.163557	3.42362
GOTERM_BP_DIRECT	GO:0006397~mRNA processing	27	1.73745	0.00194775	AURKAIP1, RBM15B, NSRP1, SF3B4, SMNDC1, ZFP36L1, CIR1, AKAP17A, PTBP3, SCNM1, ZPR1, LSM1, ZC3H14, FMR1, AKAP8L, SAP18, PRPF3, SF3A2, PRPF18, SF3A1, SON, PAPD4, LSM10, RBM39, SCAF8, PRPF38B, XRN2	1334	179	16792	1.8987	0.999496	0.165403	3.54825
GOTERM_BP_DIRECT	GO:0061025~membrane fusion	11	0.707851	0.0019632	SNAP29, ANXA7, STX5, STX1A, STX4, STX3, RABIF, NAPG, NSFL1C, GOSR2, NAPA	1334	44	16792	3.14693	0.999526	0.163061	3.57591
GOTERM_BP_DIRECT	GO:0015031~protein transport	49	3.15315	0.00202848	RAB5C, TSG101, ZMAT3, VPS37A, TIMM9, NECAP2, AAGAB, SCAMP4, AP5Z1, SCAMP2, RAB39B, FAM21C, FAM21A, SPIRE1, CHMP1A, CHMP1B, RAB18, PSEN1, ARCN1, RAB5A, PDCD6IP, AKAP8, ERC1, SNX12, SERP1, UBAP1, SNAP29, RAB7A, AFTPH, EXOC8, CCDC91, CHMP2B, XBP1, LSG1, APBA3, BTF3, EXOC3, DOPEY2, EXOC2, SEC61A1, NMD3, GDI2, RABIF, TMEM115, COG5, ARF1, RAB35, RAB22A, YKT6	1334	395	16792	1.56151	0.999633	0.16452	3.69271
GOTERM_BP_DIRECT	GO:0007264~small GTPase mediated signal transduction	34	2.1879	0.00206183	RAB7A, RAB5C, MRAS, RRAD, ARHGAP35, HMOX1, RHOD, RAB27B, RAPGEF2, RHOF, RHOG, GDI2, RABIF, RAB39B, RALBP1, GEM, SRPRB, VAV2, SH2D3C, RAB32, ARHGAP32, RND1, RAB18, ARF1, RAB35, RAB22A, RAB5A, RHEB, ARL8A, RAP1B, TNK2, RAB10, RASD1, NKIRAS2	1334	246	16792	1.73976	0.999677	0.163599	3.75233
GOTERM_BP_DIRECT	GO:0030968~endoplasmic reticulum unfolded protein response	11	0.707851	0.00234765	ATF6, CTH, XBP1, AARS, CREB3L2, HSPA5, AMFR, NFE2L2, EDEM2, PPP1R15A, SERP1	1334	45	16792	3.07699	0.999894	0.180466	4.26187
GOTERM_BP_DIRECT	GO:0016236~macroautophagy	15	0.965251	0.0023891	BECN1, ATG101, PRKAG2, WIPI2, UBQLN1, WIPI1, ATG3, MFN2, MTMR14, C6ORF106, SQSTM1, RB1CC1, UBC, RHEB, MTOR	1334	76	16792	2.48442	0.99991	0.179816	4.33553
GOTERM_BP_DIRECT	GO:0018107~peptidyl-threonine phosphorylation	10	0.643501	0.00241125	MAPK1, GSK3B, DYRK1A, MAP3K10, LMTK2, WNK1, MTOR, PRKCD, ACVR1, MARK2	1334	38	16792	3.31255	0.999918	0.177905	4.37489
GOTERM_BP_DIRECT	GO:0032869~cellular response to insulin stimulus	15	0.965251	0.00271133	MYO5A, IRS2, GCLC, PPARG, TRIB3, FER, USF1, ZFP36L1, INHBB, CAPN10, XBP1, GSK3A, RAB10, MYC, SLC9A1	1334	77	16792	2.45215	0.999974	0.194116	4.9065
GOTERM_BP_DIRECT	GO:0008286~insulin receptor signaling pathway	15	0.965251	0.00306843	ATP6V0C, IRS2, GRB10, SOGA1, GSK3A, ATP6V1E1, BAIAP2, BCAR1, IDE, ATP6V1G1, ATP6V0D1, ATP6V1D, ATP6V0A2, ATP6V0B, ATP6V1F	1334	78	16792	2.42071	0.999994	0.212899	5.53548
GOTERM_BP_DIRECT	GO:0070936~protein K48-linked ubiquitination	11	0.707851	0.00329706	UBE2D3, UBE2A, RNF6, UBE2D2, RNF115, UBE2K, RNF216, RNF187, RFFL, CDC34, AMFR	1334	47	16792	2.94606	0.999997	0.222927	5.9361
GOTERM_BP_DIRECT	GO:0006366~transcription from RNA polymerase II promoter	59	3.79665	0.00389262	ELF4, LMO4, FOXK2, NFKB2, MAX, CREB3L2, DDX21, MYC, FOXJ2, RELA, GMEB1, CDK9, HMGA1, TAF10, TAF12, EP300, PRDM4, MTF1, FOXC1, NFE2L1, NFE2L2, TGFB1I1, SUPT3H, CAMTA2, POLR2J, POLR2I, ATF1, PLAGL1, XBP1, MLLT1, BTF3, VEZF1, PLAGL2, MAFG, DVL2, CEBPA, MAFF, CEBPB, CREB3, CEBPG, KLF11, TAF7, SMAD4, AFF4, SMAD2, USF1, USF2, DVL1, MEF2D, DLX2, ATF5, ATF4, PSMC5, ATF3, EBF4, GTF2F1, HIVEP1, KLF4, ZNF768	1334	513	16792	1.44771	1	0.253337	6.97218
GOTERM_BP_DIRECT	GO:0045893~positive regulation of transcription, DNA-templated	59	3.79665	0.00423415	ELF4, GPBP1, PPARG, RNF187, ZXDA, EPC1, BRPF1, CREB3L2, MYC, ZNF496, FGF2, RHOG, PSMD9, ZNF281, ATF7IP, BCL10, FOXJ2, RELA, HMGA1, ARHGEF11, MAPK1, NCOA1, PSEN1, NCOA6, EDF1, FOXC1, NFE2L1, TGFB1I1, MED1, ACVR1, SUPT3H, CNBP, TFE3, PPM1A, TRIM16, NR1H2, NR1D1, HINFP, WAC, FBXW11, RNF14, ZNF398, DVL2, KLF6, KAT8, KLF7, CREB3, CREBBP, SMAD4, SMAD2, SNAI1, DVL1, ATF5, RNF6, ATF4, PSMC5, ETS2, SETD7,…	1334	515	16792	1.44209	1	0.267895	7.56144
GOTERM_BP_DIRECT	GO:1900103~positive regulation of endoplasmic reticulum unfolded protein response	4	0.2574	0.00441768	BAK1, XBP1, BAX, ERN1	1334	5	16792	10.0702	1	0.27338	7.87663
GOTERM_BP_DIRECT	GO:0075525~viral translational termination-reinitiation	4	0.2574	0.00441768	EIF3D, EIF3A, EIF3G, EIF3L	1334	5	16792	10.0702	1	0.27338	7.87663
GOTERM_BP_DIRECT	GO:1903912~negative regulation of endoplasmic reticulum stress-induced eIF2 alpha phosphorylation	4	0.2574	0.00441768	NCK2, DNAJC3, PPP1R15B, PPP1R15A	1334	5	16792	10.0702	1	0.27338	7.87663
GOTERM_BP_DIRECT	GO:0042787~protein ubiquitination involved in ubiquitin-dependent protein catabolic process	23	1.48005	0.00470291	FZR1, CBL, RNF185, UBR4, KEAP1, GAN, RFFL, BTBD9, ARIH1, RNF115, HUWE1, AREL1, NEDD4, UBC, KLHL21, ANKIB1, KLHL11, AMFR, SMURF1, RNF14, TRIP12, FBXO7, HECTD1	1334	153	16792	1.89227	1	0.283829	8.36447
GOTERM_BP_DIRECT	GO:1903543~positive regulation of exosomal secretion	6	0.3861	0.00478443	RAB7A, SDC1, TSG101, SDCBP, HGS, PDCD6IP	1334	15	16792	5.03508	1	0.28364	8.50345
GOTERM_BP_DIRECT	GO:0016579~protein deubiquitination	17	1.09395	0.00479652	USP40, USP9X, DMWD, CYLD, ATXN3, JOSD1, EIF3F, USP38, ZC3H12A, USP20, USP36, UCHL3, USP25, USP24, USP15, USP14, USP31	1334	99	16792	2.16153	1	0.280034	8.52405
GOTERM_BP_DIRECT	GO:0006986~response to unfolded protein	10	0.643501	0.00495248	MFN2, CREBRF, HSPH1, CHAC1, FBXO6, HSPA4, FAF2, DNAJB1, HERPUD2, HSPA8	1334	42	16792	2.99707	1	0.283524	8.78932
GOTERM_BP_DIRECT	GO:0000422~mitophagy	9	0.579151	0.00524111	GABARAPL3, SQSTM1, RB1CC1, WIPI2, ATG3, WIPI1, WDR45, MARK2, FBXO7	1334	35	16792	3.23684	1	0.293132	9.27833
GOTERM_BP_DIRECT	GO:1901030~positive regulation of mitochondrial outer membrane permeabilization involved in apoptotic signaling pathway	5	0.32175	0.00562456	BAK1, GSK3A, BAX, GSK3B, ZNF205	1334	10	16792	6.29385	1	0.306607	9.92415
GOTERM_BP_DIRECT	GO:0006412~translation	33	2.12355	0.00588843	RPL18, MRPS16, RPL19, RPL13, MRPS12, CPEB4, HBS1L, RPL36, MRPL10, RPS27, SLC25A25, MRPL15, RPLP0, RPLP1, SLC25A3, MRPL18, FAU, RPL10, MRPL37, RPL10A, RPS21, MRPL34, RPL36AL, MRPL2, SLC25A6, SARS, MRRF, MRPS2, EIF4G1, MRPL49, SLC25A38, DHPS, PELO	1334	253	16792	1.64187	1	0.314154	10.366
GOTERM_BP_DIRECT	GO:0060999~positive regulation of dendritic spine development	7	0.45045	0.00609578	MAPK6, PSEN1, ARF1, APOE, FMR1, CAMK1, MTOR	1334	22	16792	4.00518	1	0.318953	10.7118
GOTERM_BP_DIRECT	GO:0008380~RNA splicing	24	1.5444	0.00618134	RBM15B, FMR1, AKAP8L, SAP18, RP9, PRPF3, PRPF18, NSRP1, SF3A2, SF3B4, PRPF6, SON, CIR1, AKAP17A, PPP2CA, PTBP3, LSM10, SCNM1, ZPR1, ZRSR2, RBM39, SCAF8, LSM1, PRPF38B	1334	166	16792	1.81991	1	0.318425	10.8542
GOTERM_BP_DIRECT	GO:0090263~positive regulation of canonical Wnt signaling pathway	19	1.22265	0.00644852	DVL2, RNF220, XIAP, DVL1, TNKS2, PSMF1, PSMB4, PSMB7, PSMC5, CSNK1D, NRARP, PSMA5, UBC, PSMD4, PSME4, FGF2, PSMD7, PSMD8, PSMD9	1334	120	16792	1.99305	1	0.32546	11.2972
GOTERM_BP_DIRECT	GO:0042149~cellular response to glucose starvation	8	0.514801	0.00645548	ATF4, BECN1, XBP1, SH3GLB1, CPEB4, ZC3H12A, HSPA5, NFE2L2	1334	29	16792	3.47247	1	0.321646	11.3087
GOTERM_BP_DIRECT	GO:0006897~endocytosis	21	1.35135	0.00677511	RAB7A, C9ORF72, SNX9, LDLR, BECN1, RALBP1, SNX8, MICALL1, NPC1, CSNK1D, AAK1, RAB22A, NECAP2, SH3KBP1, RAB5A, USP20, TNK2, BIN1, CLINT1, SH3GL1, RIN3	1334	139	16792	1.90174	1	0.33048	11.836
GOTERM_BP_DIRECT	GO:0007249~I-kappaB kinase/NF-kappaB signaling	12	0.772201	0.00697931	IRAK2, BCL10, RIPK1, RELB, TICAM1, UBC, RBCK1, RIPK2, NFKB2, TNIP2, TAB3, NKIRAS2	1334	60	16792	2.51754	1	0.334462	12.1712
GOTERM_BP_DIRECT	GO:0007049~cell cycle	29	1.86615	0.00733541	STEAP3, ZMYND11, PARD3, STK10, BEX2, URGCP, RCBTB1, CYLD, CCDC124, RB1CC1, TLK1, CCNO, CABLES1, SPECC1L, GPS1, TXNL4B, CCPG1, PIM1, PRKCD, TACC1, GPS2, MAPK1, MAPK6, PTP4A1, CAMK1, PELO, PDCD6IP, CCNDBP1, C9ORF69	1334	217	16792	1.68223	1	0.34408	12.753
GOTERM_BP_DIRECT	GO:0045892~negative regulation of transcription, DNA-templated	56	3.6036	0.00805606	TSG101, RBM15B, PPARG, CBX4, ZEB1, RLIM, EPC1, DEDD2, ATF7IP, ZNF281, ZBTB21, ZNF280C, RELA, ARID5A, TLE1, HMGA1, HES1, CHMP1A, EREG, SMARCE1, MAP3K10, ZNF746, RASD1, GCLC, TRIB3, ARHGAP35, TRIM11, NR1H2, MINA, CIR1, NR1D1, TFDP2, HINFP, GATAD2A, PEX14, ZNF425, FBXW11, HSPA8, ZNF263, CEBPA, ZBTB7A, KAT8, CEBPB, SETDB2, TAF7, KLF11, SMAD4, SMAD2, SIRT6, SIRT1, SFMBT1, ATF5, BRMS1, PSMC5, DNAJB6, K…	1334	499	16792	1.41265	1	0.366566	13.9193
GOTERM_BP_DIRECT	GO:0045727~positive regulation of translation	11	0.707851	0.00805627	EIF6, MAPK1, PAIP1, FMR1, CIRBP, EEF2, MTOR, FAM129A, LARP4B, SERP1, LARP1	1334	53	16792	2.61254	1	0.362429	13.9196
GOTERM_BP_DIRECT	GO:0034497~protein localization to pre-autophagosomal structure	5	0.32175	0.00828848	MFN2, PACS2, WIPI2, WIPI1, WDR45	1334	11	16792	5.72168	1	0.366563	14.2922
GOTERM_BP_DIRECT	GO:0046325~negative regulation of glucose import	5	0.32175	0.00828848	PEA15, GRB10, GSK3A, SIRT6, MYC	1334	11	16792	5.72168	1	0.366563	14.2922
GOTERM_BP_DIRECT	GO:0031647~regulation of protein stability	13	0.836551	0.0085552	QRSL1, MAPK1, XBP1, SH3GLB1, CDKN2AIP, MUL1, DPM2, GIPC1, SUGT1, PSMD8, HSPA8, PINX1, FBXO7	1334	70	16792	2.33772	1	0.371741	14.7184
GOTERM_BP_DIRECT	GO:1901216~positive regulation of neuron death	6	0.3861	0.00862867	APOE, AIMP2, EIF2S1, GSK3B, MTOR, ZNF746	1334	17	16792	4.44272	1	0.370224	14.8354
GOTERM_BP_DIRECT	GO:0051092~positive regulation of NF-kappaB transcription factor activity	20	1.287	0.00881201	TRAF1, IRAK2, BCL10, ARHGEF2, DDRGK1, MTDH, RELA, NFKBIB, NFKBIA, FER, NFKB2, TAB3, CTH, TRIM8, RIPK1, TICAM1, UBC, RBCK1, RIPK2, ERC1	1334	133	16792	1.89289	1	0.372416	15.1268
GOTERM_BP_DIRECT	GO:0006695~cholesterol biosynthetic process	9	0.579151	0.00881388	CNBP, G6PD, SQLE, DHCR7, HMGCS1, MVK, IDI1, NSDHL, FDFT1	1334	38	16792	2.9813	1	0.368567	15.1297
GOTERM_BP_DIRECT	GO:0019058~viral life cycle	8	0.514801	0.00946557	TSG101, CHMP4B, CHMP4A, UBC, VPS37A, PDCD6IP, FURIN, CHMP2B	1334	31	16792	3.24844	1	0.385792	16.1578
GOTERM_BP_DIRECT	GO:0043967~histone H4 acetylation	8	0.514801	0.00946557	EPC1, ING3, NCOA1, EP300, BEND3, TRIM16, TRRAP, EP400	1334	31	16792	3.24844	1	0.385792	16.1578
GOTERM_BP_DIRECT	GO:0007015~actin filament organization	13	0.836551	0.0106804	ARHGEF2, BCAR1, CTNNA1, TPM1, WHAMM, NCK2, CDC42EP2, RND1, ARF1, FAT1, WASL, RHOF, DBN1	1334	72	16792	2.27278	1	0.419095	18.0429
GOTERM_BP_DIRECT	GO:0006364~rRNA processing	28	1.8018	0.0111176	RPP38, RPL18, RPL19, RPL13, UTP6, NOB1, RPL36, RIOK2, DDX27, EXOSC10, SBDS, RPS27, RPLP0, RPLP1, RPL10, FAU, DDX21, RPL10A, RPS21, BYSL, DIEXF, EXOSC1, SIRT1, CSNK1D, UTP14A, WDR43, XRN2, UTP14C	1334	214	16792	1.64699	1	0.427806	18.7114
GOTERM_BP_DIRECT	GO:0006469~negative regulation of protein kinase activity	16	1.0296	0.0111782	DBNDD2, SOCS2, NF1, TAF7, PRKAG2, RTN4R, TRIB3, SFN, CAMK2N1, DVL1, AKT1S1, PRKAR1A, MLLT1, DNAJC3, GADD45B, GADD45A	1334	99	16792	2.03438	1	0.425486	18.8036
GOTERM_BP_DIRECT	GO:0000920~cell separation after cytokinesis	6	0.3861	0.0111799	CHMP1A, CHMP1B, CHMP4B, CHMP4A, PDCD6IP, CHMP2B	1334	18	16792	4.1959	1	0.42154	18.8062
GOTERM_BP_DIRECT	GO:0006414~translational elongation	6	0.3861	0.0111799	GTPBP2, EEF1B2, EEF1A1P5, HBS1L, RPLP1, EEF2	1334	18	16792	4.1959	1	0.42154	18.8062
GOTERM_BP_DIRECT	GO:0007032~endosome organization	8	0.514801	0.0113049	PLEKHF1, ALS2, VPS18, TMEM127, EXOC8, RAB22A, ALS2CL, CHMP2B	1334	32	16792	3.14693	1	0.421148	18.9962
GOTERM_BP_DIRECT	GO:0036499~PERK-mediated unfolded protein response	5	0.32175	0.0116613	ATF4, ATF3, EIF2S1, HSPA5, NFE2L2	1334	12	16792	5.24488	1	0.42717	19.5356
GOTERM_BP_DIRECT	GO:0032801~receptor catabolic process	5	0.32175	0.0116613	NEDD4, BECN1, SH3GLB1, SMURF1, KIF16B	1334	12	16792	5.24488	1	0.42717	19.5356
GOTERM_BP_DIRECT	GO:0000375~RNA splicing, via transesterification reactions	7	0.45045	0.0117937	WDR83, SLU7, PRPF3, LSM1, SF3B4, SMNDC1, PRPF6	1334	25	16792	3.52456	1	0.426926	19.7351
GOTERM_BP_DIRECT	GO:0016049~cell growth	11	0.707851	0.0118623	NOTCH2, NUPR1, NDRG4, XBP1, SLC3A2, MTOR, DDX5, EMP3, SEC61A1, XRN2, SLC9A1	1334	56	16792	2.47259	1	0.42497	19.8383
GOTERM_BP_DIRECT	GO:0046330~positive regulation of JNK cascade	12	0.772201	0.012697	ZNF622, TAOK1, RB1CC1, RIPK1, DUSP15, GADD45G, MAP3K10, SDCBP, RIPK2, GADD45B, GADD45A, TRAF4	1334	65	16792	2.32388	1	0.4432	21.0839
GOTERM_BP_DIRECT	GO:0001701~in utero embryonic development	25	1.60875	0.0131737	GNA13, ALS2, MAFG, MAFF, ZFAND5, UBE2A, GNA12, SMAD4, GJB3, SMAD2, KEAP1, OCRL, TPM1, ZMIZ1, TANC2, ANKRD11, APBA3, HINFP, SYF2, BTF3, FOXC1, MYC, SCO2, ACVR1, RTCB	1334	187	16792	1.68285	1	0.451523	21.7869
GOTERM_BP_DIRECT	GO:0001889~liver development	13	0.836551	0.0131916	CEBPA, RELA, CEBPG, NF1, QDPR, HMGCS1, RHBDD3, HES1, PHF2, XBP1, IGF2R, RB1CC1, MED1	1334	74	16792	2.21135	1	0.448173	21.8132
GOTERM_BP_DIRECT	GO:0050852~T cell receptor signaling pathway	21	1.35135	0.0132501	BCL10, BCAR1, RELA, NFKBIA, PSMF1, MAPK1, PSMB4, PSMB7, PSMC5, UBE2D2, PSEN1, PSMA5, UBC, RBCK1, RIPK2, PSMD4, PSME4, PSMD7, FBXW11, PSMD8, PSMD9	1334	148	16792	1.78609	1	0.445887	21.8989
GOTERM_BP_DIRECT	GO:0070301~cellular response to hydrogen peroxide	11	0.707851	0.0133922	LCN2, OSER1, CYP1B1, RELA, AKR1B1, ANXA1, NFE2L2, PRKCD, SIRT1, KLF4, SETX	1334	57	16792	2.42921	1	0.445704	22.1072
GOTERM_BP_DIRECT	GO:0060071~Wnt signaling pathway, planar cell polarity pathway	15	0.965251	0.0134508	DVL2, FZD5, DVL1, PSMF1, PSMB4, PSMB7, PSMC5, PSMA5, UBC, PSMD4, SMURF1, PSME4, PSMD7, PSMD8, PSMD9	1334	92	16792	2.05234	1	0.443491	22.1928
GOTERM_BP_DIRECT	GO:0007179~transforming growth factor beta receptor signaling pathway	15	0.965251	0.0134508	PARD3, LTBP2, SMAD7, USP9X, CBL, SMAD4, SMAD2, FURIN, DUSP15, UBC, SMURF1, ZYX, GDF15, USP15, ACVR1	1334	92	16792	2.05234	1	0.443491	22.1928
GOTERM_BP_DIRECT	GO:1904628~cellular response to phorbol 13-acetate 12-myristate	4	0.2574	0.0136974	ZFP36L1, RPLP0, ZC3H12A, MYC	1334	7	16792	7.19297	1	0.445855	22.5524
GOTERM_BP_DIRECT	GO:0075522~IRES-dependent viral translational initiation	4	0.2574	0.0136974	EIF3D, EIF3A, PCBP2, EIF3F	1334	7	16792	7.19297	1	0.445855	22.5524
GOTERM_BP_DIRECT	GO:0046827~positive regulation of protein export from nucleus	6	0.3861	0.0142003	ANP32B, GSK3B, PPM1A, CAMK1, SFN, EMD	1334	19	16792	3.97507	1	0.454203	23.281
GOTERM_BP_DIRECT	GO:0006612~protein targeting to membrane	7	0.45045	0.0143257	GOLGA7, PARD3, GOLGA7B, SDCBP, ATG3, RAB3IP, MICALL1	1334	26	16792	3.389	1	0.453556	23.4615
GOTERM_BP_DIRECT	GO:0006997~nucleus organization	7	0.45045	0.0143257	CHMP1A, CHMP1B, CHMP4B, CHMP4A, PDCD6IP, BIN1, CHMP2B	1334	26	16792	3.389	1	0.453556	23.4615
GOTERM_BP_DIRECT	GO:0030036~actin cytoskeleton organization	19	1.22265	0.0143892	SPECC1L, BCR, PHACTR4, LIMK1, MRAS, ABLIM3, NF1, SPIRE1, PALLD, ARHGEF11, CDC42EP2, ATXN3, SDCBP, PAFAH1B1, CAP1, MKL1, ABL2, RHOG, DNAJB6	1334	130	16792	1.83974	1	0.451497	23.5528
GOTERM_BP_DIRECT	GO:0051865~protein autoubiquitination	10	0.643501	0.0157521	UBE2D3, UBE2A, UBE2D2, RNF115, RNF220, RNF185, RNF187, AMFR, CNOT4, RNF41	1334	50	16792	2.51754	1	0.478465	25.4882
GOTERM_BP_DIRECT	GO:0016477~cell migration	23	1.48005	0.0177087	BCAR1, ARHGAP35, PIP5K1A, VAV2, PALLD, SNAI1, ELMO2, SDC2, HES1, NCK2, SDC1, BTG1, GSK3B, FAT1, SH3KBP1, ZRANB1, JAK1, FOXC1, TNK2, USP24, ABL2, SLC9A1, CDC42BPB	1334	172	16792	1.68324	1	0.515641	28.1855
GOTERM_BP_DIRECT	GO:1903955~positive regulation of protein targeting to mitochondrion	14	0.900901	0.0177458	ABLIM3, HPS4, FZD5, SREBF2, CSNK2A2, HES1, PSMB7, UBE2D3, HUWE1, GSK3A, SH3GLB1, USP36, PSMD8, PLAGL2	1334	86	16792	2.04916	1	0.512748	28.2358
GOTERM_BP_DIRECT	GO:0042542~response to hydrogen peroxide	10	0.643501	0.0178213	BAK1, SDC1, STK24, HMOX1, PPP2CB, EEF2, KPNA4, PPP1R15B, SIRT1, GLRX2	1334	51	16792	2.46818	1	0.510657	28.3379
GOTERM_BP_DIRECT	GO:0045604~regulation of epidermal cell differentiation	3	0.19305	0.0178935	MAFG, MAFF, KEAP1	1334	3	16792	12.5877	1	0.508536	28.4356
GOTERM_BP_DIRECT	GO:0006468~protein phosphorylation	50	3.2175	0.0183474	NRBP1, PRKAG2, FAM20C, CASK, EIF2A, FER, LATS1, CSNK2A2, AAK1, TLK1, IRAK2, BCR, BRAF, LIMK2, STK24, LIMK1, PIM1, WNK1, RPS6KC1, CDK9, PRKCD, MARK2, MAPK1, MAP4K4, HIPK1, MAPK6, ERN1, CAMK1, CDK11B, ACVR1, NEK1, STK10, TRIB3, RIOK2, VRK2, SQSTM1, LMTK2, DYRK3, CSNK1A1, TAOK1, SMAD2, TP53RK, CSNK1D, GSK3A, GSK3B, DYRK1A, JAK1, MTOR, MERTK, CDC42BPB	1334	456	16792	1.38023	1	0.513864	29.0459
GOTERM_BP_DIRECT	GO:0045732~positive regulation of protein catabolic process	11	0.707851	0.0188711	CREBRF, RAB7A, STX5, FZR1, LPCAT1, NEDD4, GSK3A, GSK3B, NDFIP1, EGLN2, RHBDD3	1334	60	16792	2.30775	1	0.520354	29.7441
GOTERM_BP_DIRECT	GO:0010033~response to organic substance	7	0.45045	0.0204748	S100P, SQLE, PPP2CA, RELA, ANXA5, GART, GLRX2	1334	28	16792	3.14693	1	0.546142	31.8418
GOTERM_BP_DIRECT	GO:0006987~activation of signaling protein activity involved in unfolded protein response	4	0.2574	0.0206358	BAK1, BAX, ERN1, HSPA5	1334	8	16792	6.29385	1	0.545482	32.0491
GOTERM_BP_DIRECT	GO:1903071~positive regulation of ER-associated ubiquitin-dependent protein catabolic process	4	0.2574	0.0206358	XBP1, NFE2L2, UBQLN1, SGTA	1334	8	16792	6.29385	1	0.545482	32.0491
GOTERM_BP_DIRECT	GO:0071499~cellular response to laminar fluid shear stress	4	0.2574	0.0206358	XBP1, NFE2L2, KLF4, SREBF2	1334	8	16792	6.29385	1	0.545482	32.0491
GOTERM_BP_DIRECT	GO:1901673~regulation of mitotic spindle assembly	5	0.32175	0.020759	CHMP1A, CHMP1B, CHMP4B, PDCD6IP, CHMP2B	1334	14	16792	4.49561	1	0.544175	32.2073
GOTERM_BP_DIRECT	GO:0035729~cellular response to hepatocyte growth factor stimulus	5	0.32175	0.020759	GCLC, RELA, GSK3B, BCAR1, MED1	1334	14	16792	4.49561	1	0.544175	32.2073
GOTERM_BP_DIRECT	GO:0034644~cellular response to UV	9	0.579151	0.0209793	BAK1, ATF4, EP300, NEDD4, EIF2S1, BAX, FMR1, CREBBP, MYC	1334	44	16792	2.57476	1	0.544569	32.4893
GOTERM_BP_DIRECT	GO:0031145~anaphase-promoting complex-dependent catabolic process	13	0.836551	0.0214299	PSMB4, PSMF1, FZR1, PSMB7, PSMC5, PSMA5, UBC, FBXO31, PSMD4, PSME4, PSMD7, PSMD8, PSMD9	1334	79	16792	2.07139	1	0.548873	33.0628
GOTERM_BP_DIRECT	GO:0048844~artery morphogenesis	6	0.3861	0.0217784	HES1, SMAD7, APOE, ZMIZ1, NF1, FOXC1	1334	21	16792	3.59649	1	0.551359	33.5031
GOTERM_BP_DIRECT	GO:0007163~establishment or maintenance of cell polarity	7	0.45045	0.024132	ACTR3, PARD3, FAT1, MAP7, CAP1, CTNNA1, CDC42BPB	1334	29	16792	3.03841	1	0.585627	36.4061
GOTERM_BP_DIRECT	GO:0006974~cellular response to DNA damage stimulus	26	1.6731	0.0244788	MICA, APLF, XIAP, ZMAT3, SETX, ZC3H12A, WAC, TLK1, MYC, TRIP12, TAOK1, CBL, FMR1, ZBTB40, SMC6, RAD52, SIRT1, MAPK1, PSEN1, CDKN2AIP, NCOA6, SETD7, FBXO31, PSME4, ZNF385A, PPP1R15A	1334	208	16792	1.57346	1	0.587537	36.8237
GOTERM_BP_DIRECT	GO:0007080~mitotic metaphase plate congression	8	0.514801	0.024498	CHMP1A, CHMP1B, BECN1, CHMP4B, CHMP4A, PDCD6IP, PINX1, CHMP2B	1334	37	16792	2.72167	1	0.584492	36.8466
GOTERM_BP_DIRECT	GO:0000184~nuclear-transcribed mRNA catabolic process, nonsense-mediated decay	17	1.09395	0.0259613	RPL18, RPL19, SMG5, RPL13, SMG1, RPL36, ETF1, EXOSC10, EIF4G1, RPS27, PPP2CA, RPLP0, RPLP1, RPL10, FAU, RPL10A, RPS21	1334	119	16792	1.79824	1	0.602682	38.5792
GOTERM_BP_DIRECT	GO:0031334~positive regulation of protein complex assembly	6	0.3861	0.0263909	CDC42EP2, ICE1, GSK3B, FAF1, FGF2, FNIP1	1334	22	16792	3.43301	1	0.605493	39.0792
GOTERM_BP_DIRECT	GO:1904886~beta-catenin destruction complex disassembly	6	0.3861	0.0263909	CSNK1A1, DVL2, GSK3B, FRAT2, FZD5, DVL1	1334	22	16792	3.43301	1	0.605493	39.0792
GOTERM_BP_DIRECT	GO:0032480~negative regulation of type I interferon production	7	0.45045	0.0282013	NLRC5, TRAF3IP1, CYLD, PCBP2, UBC, RNF216, TAX1BP1	1334	30	16792	2.93713	1	0.626949	41.1444
GOTERM_BP_DIRECT	GO:0010803~regulation of tumor necrosis factor-mediated signaling pathway	7	0.45045	0.0282013	TRAF1, CYLD, HIPK1, RIPK1, UBC, RBCK1, TAX1BP1	1334	30	16792	2.93713	1	0.626949	41.1444
GOTERM_BP_DIRECT	GO:0009791~post-embryonic development	12	0.772201	0.0284076	ATF5, SGPL1, PSEN1, IGF2R, DHCR7, TBCE, RC3H2, SMAD2, SZT2, MTOR, PLAGL2, SERP1	1334	73	16792	2.06921	1	0.626428	41.3755
GOTERM_BP_DIRECT	GO:0030512~negative regulation of transforming growth factor beta receptor signaling pathway	11	0.707851	0.0285225	STRAP, SMAD7, XBP1, ZNF451, PPM1A, UBC, SMAD2, TGFB1I1, HSPA5, SMURF1, SIRT1	1334	64	16792	2.16351	1	0.624723	41.5039
GOTERM_BP_DIRECT	GO:0015825~L-serine transport	4	0.2574	0.029154	SLC1A4, SERINC2, SERINC5, SLC38A7	1334	9	16792	5.59454	1	0.629712	42.2045
GOTERM_BP_DIRECT	GO:2000188~regulation of cholesterol homeostasis	4	0.2574	0.029154	NR1H2, NR1D1, LDLR, SREBF2	1334	9	16792	5.59454	1	0.629712	42.2045
GOTERM_BP_DIRECT	GO:0016239~positive regulation of macroautophagy	6	0.3861	0.031582	SQSTM1, HMOX1, WAC, SESN2, SIRT1, LARP1	1334	23	16792	3.28375	1	0.656423	44.8249
GOTERM_BP_DIRECT	GO:0006367~transcription initiation from RNA polymerase II promoter	20	1.287	0.0322342	ESRRA, NRBP1, POLR2J, PPARG, TAF7, POLR2I, CREBBP, CDK9, TEAD3, MED10, NR2C2, NR1H2, NOTCH2, TAF10, TAF12, NR1D1, GTF2F1, MED8, NCOA6, MED1	1334	152	16792	1.65628	1	0.660922	45.5094
GOTERM_BP_DIRECT	GO:0008285~negative regulation of cell proliferation	43	2.76705	0.0324526	HIST1H2AC, CYP1B1, TSG101, STRN, ABI1, ZEB1, FTH1, BAK1, TMEM127, PTGES, RAPGEF2, FGF2, PINX1, ETV3, B4GALT1, CEBPA, DFNA5, CGRRF1, BECN1, AIMP2, KLF11, S100A11, SMAD4, ZNF503, SMAD2, SIRT6, FZD5, HMGA1, TMEM115, ATF5, NOTCH2, NCK2, TNFRSF9, EREG, RPS6KA2, BTG1, BTG3, TBRG1, HGS, TGFB1I1, EMP3, KLF4, RNF41	1334	396	16792	1.36685	1	0.660346	45.7369
GOTERM_BP_DIRECT	GO:0048147~negative regulation of fibroblast proliferation	7	0.45045	0.0326978	NUPR1, BAX, NF1, C1QL4, EMD, MYC, FTH1	1334	31	16792	2.84239	1	0.660084	45.9912
GOTERM_BP_DIRECT	GO:0044804~nucleophagy	5	0.32175	0.0332538	BECN1, WIPI2, ATG3, WIPI1, WDR45	1334	16	16792	3.93366	1	0.663328	46.5635
GOTERM_BP_DIRECT	GO:0035855~megakaryocyte development	5	0.32175	0.0332538	EP300, ABI1, ZFPM1, ZNF385A, MED1	1334	16	16792	3.93366	1	0.663328	46.5635
GOTERM_BP_DIRECT	GO:1900745~positive regulation of p38MAPK cascade	5	0.32175	0.0332538	MAP3K3, GADD45G, ZC3H12A, GADD45B, GADD45A	1334	16	16792	3.93366	1	0.663328	46.5635
GOTERM_BP_DIRECT	GO:1900034~regulation of cellular response to heat	12	0.772201	0.0338933	MAPK1, HSPH1, AKT1S1, EP300, GSK3B, BAG3, CREBBP, DNAJB1, MTOR, SIRT1, DNAJB6, HSPA8	1334	75	16792	2.01403	1	0.667411	47.2147
GOTERM_BP_DIRECT	GO:0010499~proteasomal ubiquitin-independent protein catabolic process	3	0.19305	0.0339089	KEAP1, PSME4, NFE2L2	1334	4	16792	9.44078	1	0.664592	47.2305
GOTERM_BP_DIRECT	GO:2000301~negative regulation of synaptic vesicle exocytosis	3	0.19305	0.0339089	BRAF, FMR1, RAP1B	1334	4	16792	9.44078	1	0.664592	47.2305
GOTERM_BP_DIRECT	GO:0019086~late viral transcription	3	0.19305	0.0339089	USF1, MON1B, USF2	1334	4	16792	9.44078	1	0.664592	47.2305
GOTERM_BP_DIRECT	GO:1903553~positive regulation of extracellular exosome assembly	3	0.19305	0.0339089	SDC1, SDCBP, PDCD6IP	1334	4	16792	9.44078	1	0.664592	47.2305
GOTERM_BP_DIRECT	GO:0006614~SRP-dependent cotranslational protein targeting to membrane	14	0.900901	0.0343624	RPL18, RPS27, RPL19, RPL13, RPLP0, RPLP1, FAU, RPL36, RPL10, SRPRB, RPL10A, RPS21, SEC61A1, SSR3	1334	94	16792	1.87476	1	0.666578	47.6876
GOTERM_BP_DIRECT	GO:0008654~phospholipid biosynthetic process	8	0.514801	0.0361269	SERINC5, LPCAT1, SH3GLB1, FADS1, PCYT1A, PISD, PIP5K1A, PCYT2	1334	40	16792	2.51754	1	0.68227	49.4308
GOTERM_BP_DIRECT	GO:0010508~positive regulation of autophagy	8	0.514801	0.0361269	PLEKHF1, MTDH, TRIM8, BECN1, XBP1, SH3GLB1, TICAM1, ZC3H12A	1334	40	16792	2.51754	1	0.68227	49.4308
GOTERM_BP_DIRECT	GO:0051437~positive regulation of ubiquitin-protein ligase activity involved in regulation of mitotic cell cycle transition	12	0.772201	0.0368993	PSMF1, PSMB4, FZR1, PSMB7, PSMC5, PSMA5, UBC, PSMD4, PSME4, PSMD7, PSMD8, PSMD9	1334	76	16792	1.98753	1	0.687214	50.1765
GOTERM_BP_DIRECT	GO:0035914~skeletal muscle cell differentiation	9	0.579151	0.0377134	PLAGL1, MEF2D, MAFF, ATF3, NUPR1, LEMD2, EEF2, ZNF689, EMD	1334	49	16792	2.31203	1	0.69242	50.9512
GOTERM_BP_DIRECT	GO:0007254~JNK cascade	9	0.579151	0.0377134	GPS1, IRAK2, SH2D3C, MAPK8IP2, MAP3K10, UBC, RIPK2, TAB3, GPS2	1334	49	16792	2.31203	1	0.69242	50.9512
GOTERM_BP_DIRECT	GO:0014070~response to organic cyclic compound	9	0.579151	0.0377134	ANXA7, BAK1, G6PD, PTGES, FADS1, ABCC4, ACSL3, ATF1, CPT1A	1334	49	16792	2.31203	1	0.69242	50.9512
GOTERM_BP_DIRECT	GO:0007219~Notch signaling pathway	16	1.0296	0.038449	CEBPA, APH1A, CHAC1, DTX2, APH1B, CREBBP, HES1, NOTCH2, EP300, PSEN1, NRARP, UBC, FOXC1, PSENEN, MYC, SEL1L	1334	115	16792	1.75133	1	0.696714	51.6413
GOTERM_BP_DIRECT	GO:0070126~mitochondrial translational termination	13	0.836551	0.0386443	MRPL2, MRPS16, AURKAIP1, MRPS12, MRRF, MRPL10, MRPL15, MRPL49, MRPL37, MRPL18, MRPL38, MRPL34, DAP3	1334	86	16792	1.90279	1	0.695767	51.823
GOTERM_BP_DIRECT	GO:0034063~stress granule assembly	4	0.2574	0.039238	OGFOD1, ATXN2L, PQBP1, CIRBP	1334	10	16792	5.03508	1	0.6986	52.3713
GOTERM_BP_DIRECT	GO:0007266~Rho protein signal transduction	9	0.579151	0.0418965	GNA13, CDC42EP2, CDC42EP1, PHACTR4, LIMK1, GNA12, RHOD, RHOG, ARHGEF11	1334	50	16792	2.26579	1	0.719884	54.7551
GOTERM_BP_DIRECT	GO:0097352~autophagosome maturation	6	0.3861	0.0437619	SNAP29, TSG101, VIPAS39, MCOLN1, UBQLN1, WIPI2	1334	25	16792	3.02105	1	0.732976	56.3599
GOTERM_BP_DIRECT	GO:0032481~positive regulation of type I interferon production	9	0.579151	0.0463757	EP300, ZC3HAV1, RELA, CREBBP, CRCP, NFKB2, POLR3C, POLR3E, POLR3D	1334	51	16792	2.22136	1	0.751085	58.5181
GOTERM_BP_DIRECT	GO:0016573~histone acetylation	7	0.45045	0.0488696	KAT8, CDYL, NCOA2, TADA2B, CREBBP, TRRAP, SRCAP	1334	34	16792	2.59159	1	0.766922	60.4828
GOTERM_BP_DIRECT	GO:0031293~membrane protein intracellular domain proteolysis	5	0.32175	0.0493025	APH1A, RELA, APH1B, PSENEN, NGFR	1334	18	16792	3.49659	1	0.767469	60.8148
